# Supplementary material
Source: PubMed Central journal article supplement (PMC5406249)
Supplement: NIHMS847677-supplement-supplement_1.pdf [file NIHMS847677-supplement-supplement_1.pdf]

SUPPLEMENTAL INFORMATION

Fig. S1

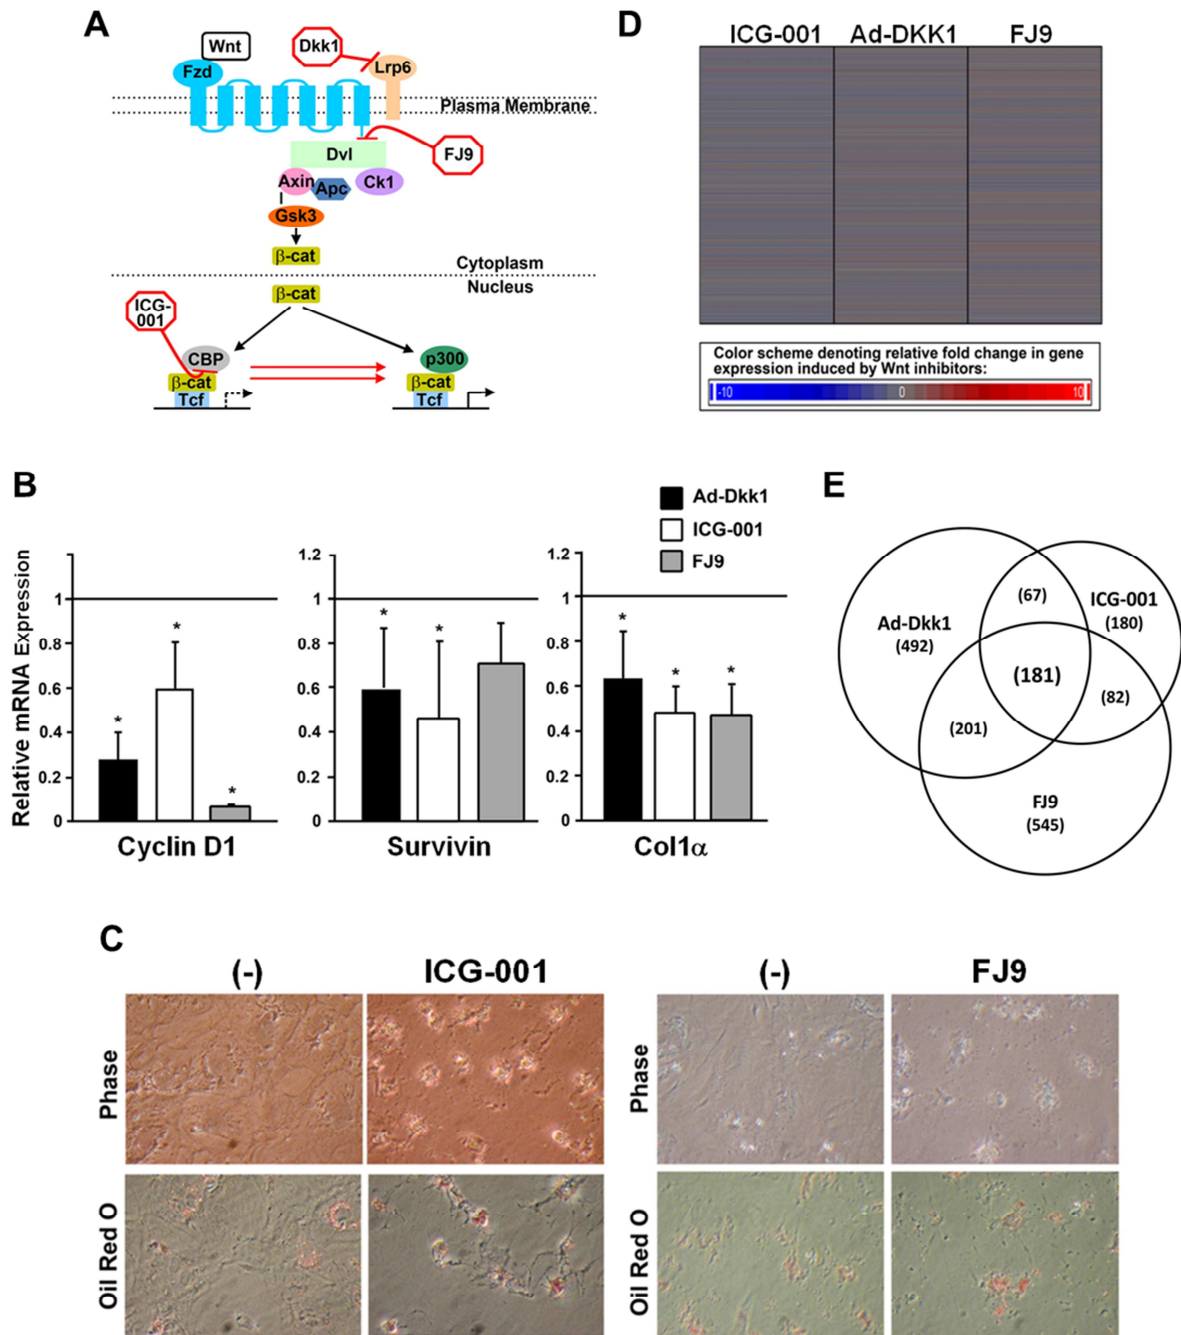

**Fig. S1. Canonical Wnt antagonism reverses HSC activation.** A. A schematic diagram depicting the sites of action for three inhibitors (Dkk1, FJ9, and ICG-001) of canonical Wnt pathway. DKK-1 blocks the canonical Wnt pathway by binding to LRP5/6 and was previously

used by us to demonstrate the role of the Wnt pathway in HSC activation <sup>1</sup>. FJ9 is an antagonist for Dvl <sup>2</sup> while ICG-001 blocks CBP association with  $\beta$ -catenin <sup>3</sup>. B. All three inhibitors suppress canonical Wnt target genes such as cyclin D1 and survivin, and HSC activation marker *Colla1*, in cultured primary rat HSCs as compared to the expression level of the respective control set at 1 as indicated by a horizontal line (n $\geq$ 3). C. Images of phase contrast microscopy and Oil red O staining of cultured rat HSCs treated with ICG-001 or FJ9. As we have previously demonstrated for DKK-1 <sup>1</sup>, ICG-001 and FJ9 morphologically attenuate activated HSCs as shown by retracted HSC morphology and increased Oil red O staining (the latter indicating increased intracellular lipids), the phenotype characteristic of quiescent HSCs. D. A heat map from microarray analysis of culture-activated (7d) HSCs treated with DKK-1, ICG-001, or FJ9 shows only small percentages (3-6%) of the total 27342 genes assayed are differentially regulated  $\geq$ 1.75 fold by the inhibitors. E. Venn diagram depicting that 181 genes (see Table S1 for list of genes) are commonly suppressed  $\geq$ 1.75 fold by the three inhibitors.

**Fig. S2**

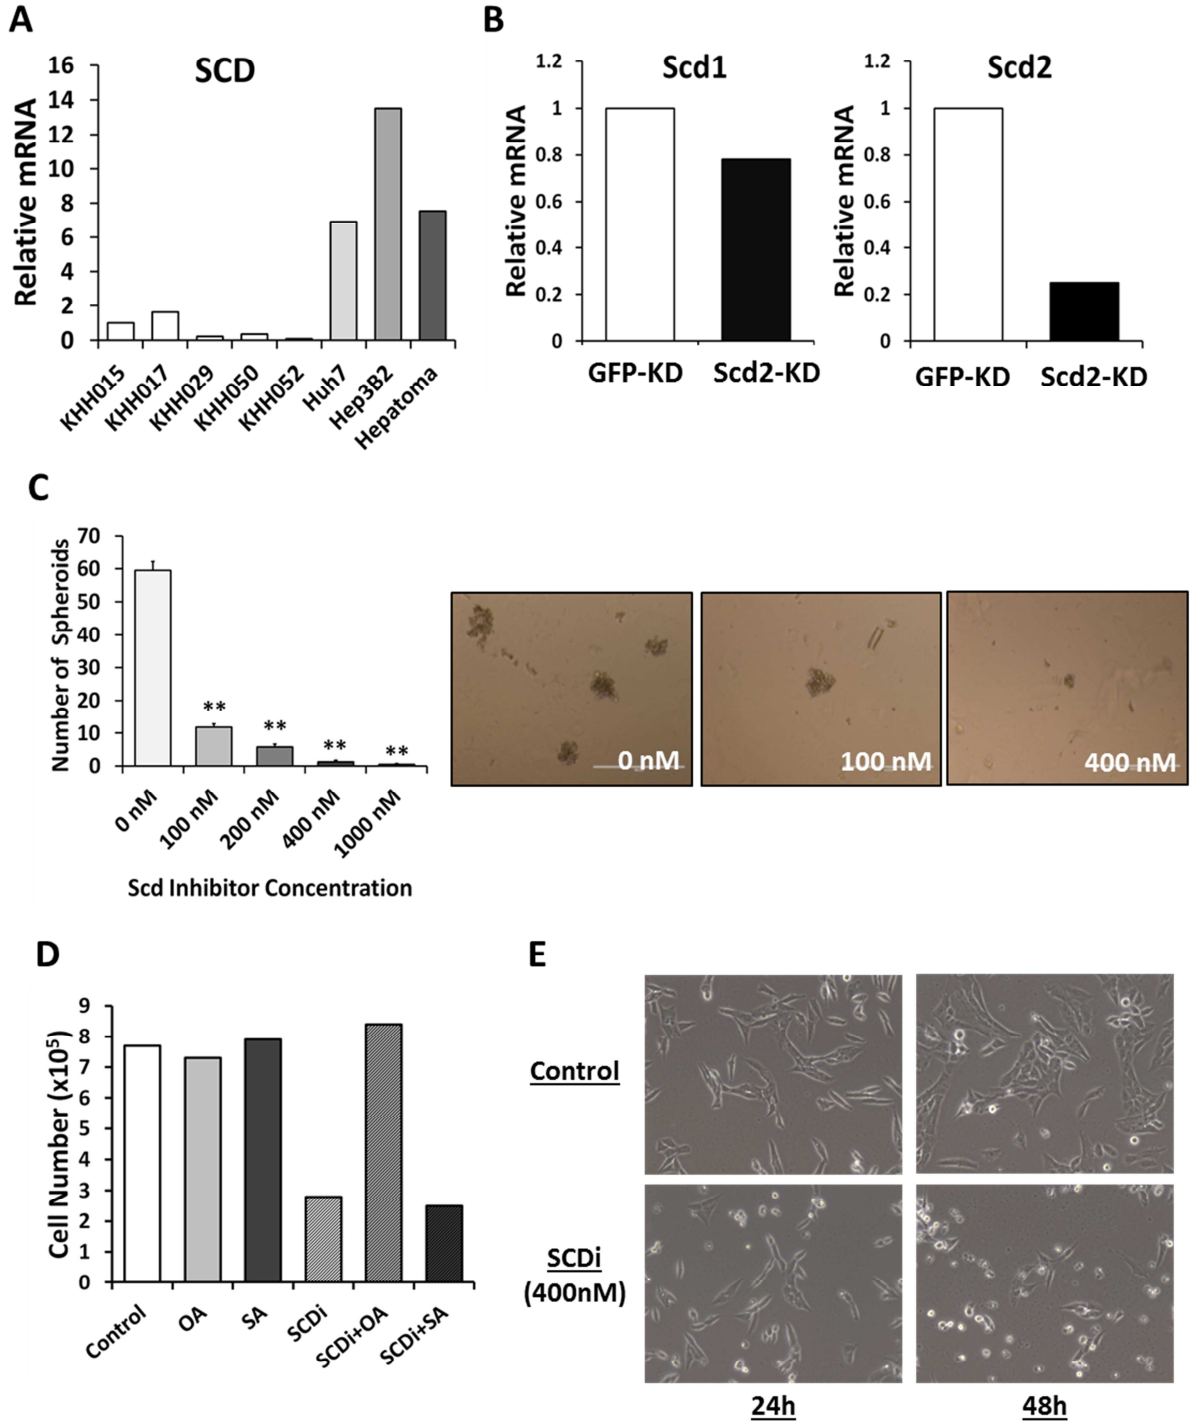

**Fig. S2. SCD is induced in human HCC cell lines, and SCD inhibition phenocopies the effects of Scd2-KD on TICs, suppressing their self-renewal in a dose-dependent manner. A.**

*SCD* is induced in 3 human HCC cell lines, Huh7, PLC/PRF/5, and Hep3B vs. normal human hepatocytes, as quantitated by qPCR. B. *Scd2* not *Scd1*, is selectively knocked down (~80%) in a clone of mouse liver TICs stably transduced with lentiviral shRNA targeting *Scd2* (*Scd2*-KD) vs. a control clone transduced with lentiviral shRNA targeting GFP (*GFP*-KD). C. Pharmacologic inhibitor SCDi suppresses self-renewal in a dose-dependent manner, as assessed by spheroid formation. At just 400 nM, SCDi almost completely abolishes spheroid formation and drastically reduces spheroid size (n=3). D. SCDi (400 nM) completely abrogates TIC growth at 48 h post-treatment, and this effect is entirely rescued by OA, the product of SCD, but not SA, the substrate of SCD (n=1). This supports not only the specificity of the SCDi used, but also confirms the dependence of TIC self-renewal on SCD's production of OA. E. Morphological analysis reveals a rounded, less-spread, more-quiescent TIC phenotype with SCDi (400 nM) treatment at 48 h, and this effect is entirely rescued by OA but not SA (data not shown).

**Fig. S3**

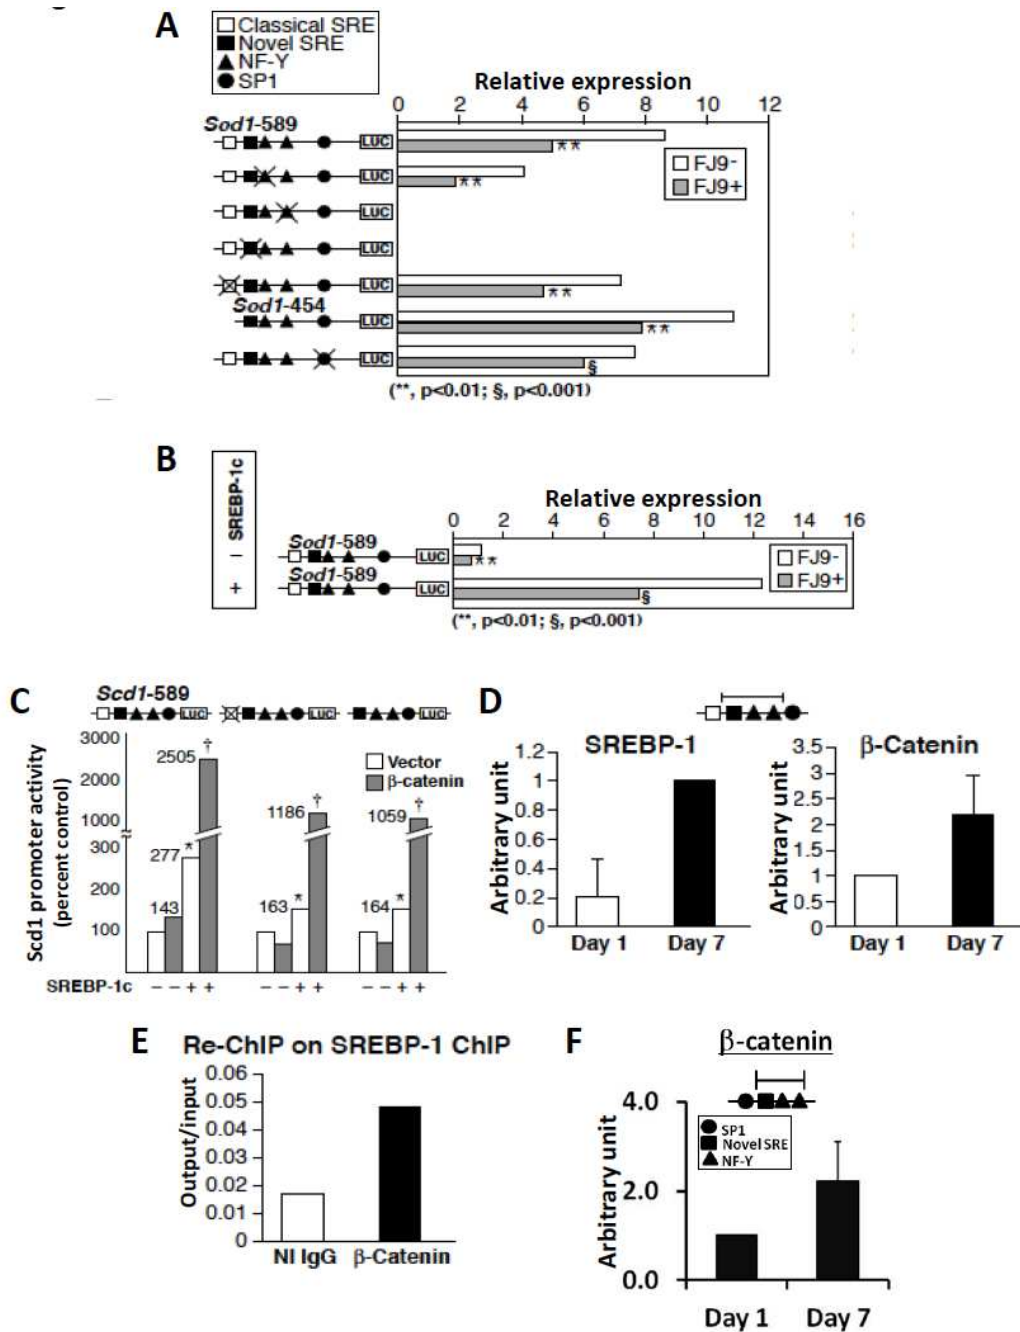

**Fig. S3.  $\beta$ -catenin interacts with SREBP-1c to promote *Scd1/2* transcription.** A. Mouse *Scd1* promoter (-589/+81) with or without various mutations was tested as a luciferase reporter to determine the effects of FJ9 in BSCs. Activities of all constructs are suppressed by FJ9 except for those with novel SRE or proximal NF-Y mutations which abrogate activities, confirming the importance of these two sites. A mutation of the distal NF-Y site reduces the promoter activity

by half. With this mutation or other constructs including that with a mutated or deleted classical SRE, FJ9 still inhibits the promoter activity, suggesting the novel SRE and proximal NF-Y sites are the targets of FJ9. B. *Scd1* promoter activity induced by SREBP-1c is suppressed with FJ9. C. SREBP-1c induced promoter activity is enhanced by  $\beta$ -catenin (n=3). \*p<0.05 vs. without  $\beta$ -catenin and without SREBP-1c, †p<0.05 vs. without  $\beta$ -catenin but with SREBP-1c. D. ChIP-qPCR analysis detects increased enrichments of SREBP-1 and  $\beta$ -catenin at the region with novel SRE/NF-Y elements in day 7 vs. day 1 cells. E. Sequential ChIP analysis detects increased binding of  $\beta$ -catenin to SREBP-1 bound to novel SRE/NF-Y sites in day 7 HSCs. F. ChIP-qPCR analysis for  $\beta$ -catenin shows its enrichment at the region of the mouse *Scd2* proximal promoter with novel SRE/NF-Y sites, in day 7 vs. day 1 HSCs.

**Fig. S4**

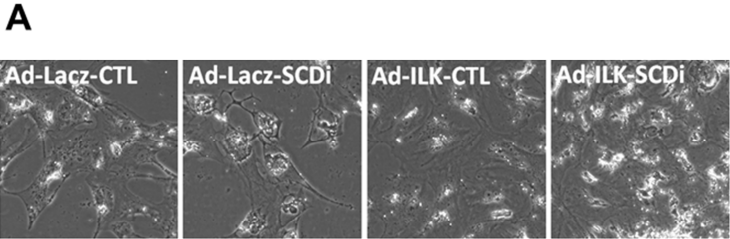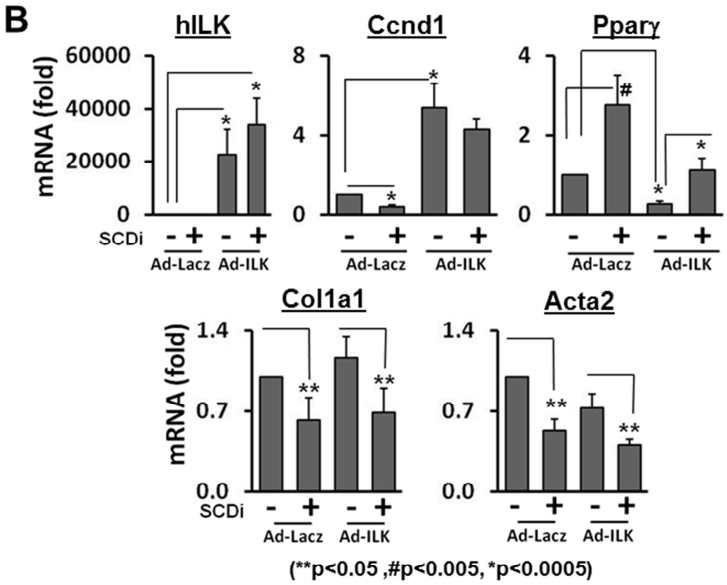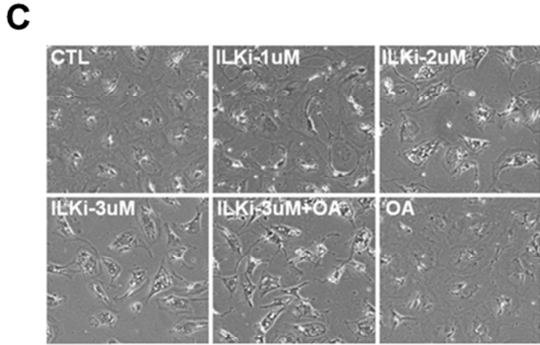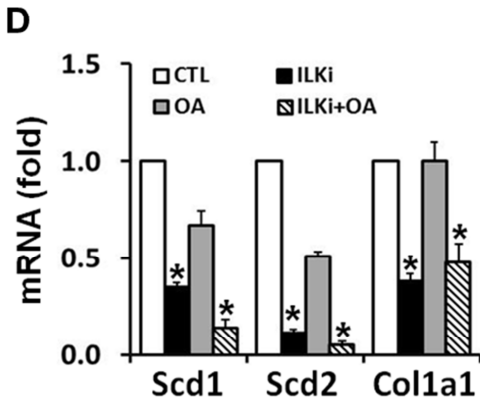

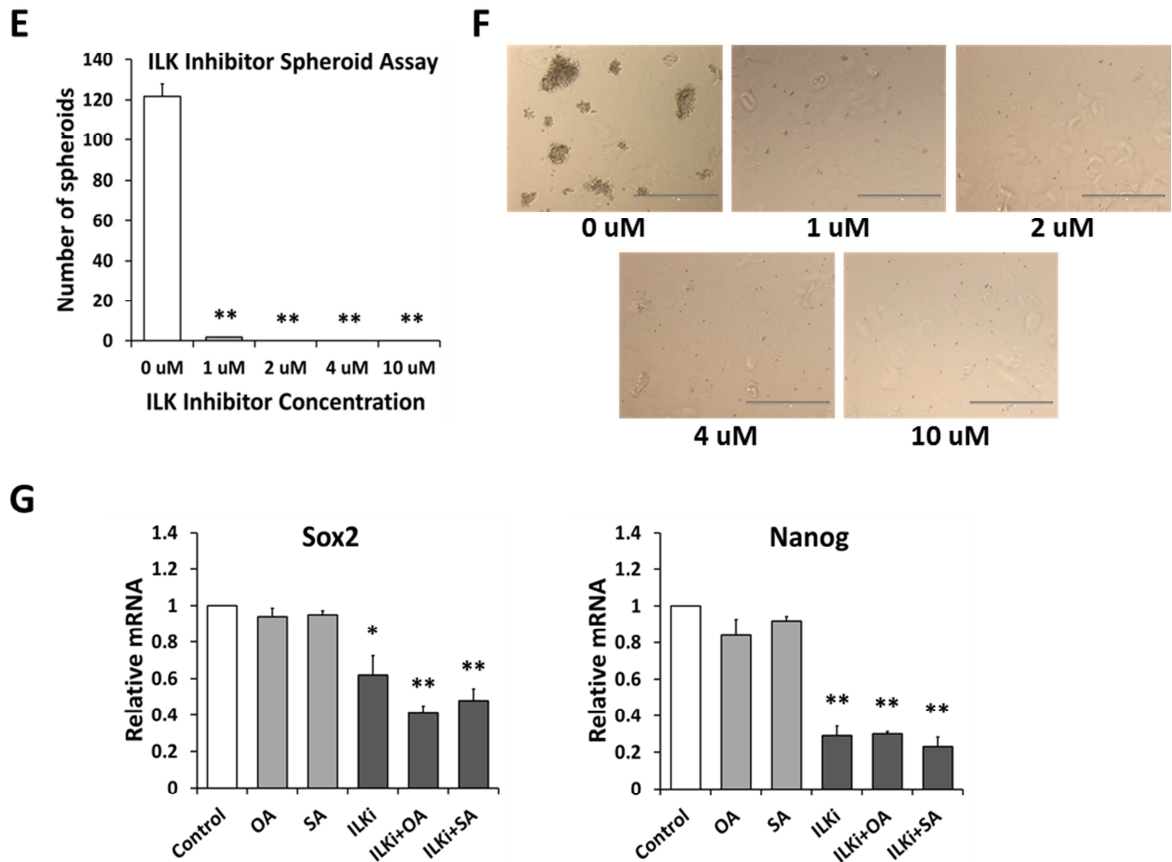

**Fig. S4. SCD acts upstream of ILK to promote canonical Wnt pathway.** A. The pre-treatment of rat primary culture activated HSCs with Ad-hILK vs. control Ad-LacZ partially prevents SCD inhibitor-induced morphologic reversal to the quiescent state. B. Ad-hILK induces expression of canonical Wnt target gene, *Ccnd1*, and prevents SCD inhibitor-mediated suppression of *Ccnd1* in rat primary culture activated HSCs. Ad-hILK also suppresses HSC quiescence gene *Ppar $\gamma$* , but this suppression is attenuated by SCD inhibitor-treatment. Interestingly, HSC activation markers, *Colla1* and *Acta2*, do not appear to be induced by Ad-hILK, but both genes are suppressed by SCD inhibitor-treatment. C. The treatment of rat primary culture-activated HSCs with the cell-permeable ILK inhibitor Cpd 22 (ILKi, 3  $\mu$ M) results in a morphologic reversal to the quiescent state, but this effect is not rescued by OA. D. Similarly, ILKi-mediated suppression of *Scd1*, *Scd2*, *Colla1* mRNA levels in rat HSCs are not rescued with OA compared to vehicle-treated control (n=3). E and F. ILKi markedly suppresses TIC's spheroid formation even at a low micromolar range (n=3). G. ILKi also inhibits Sox2 and Nanog expression but these effects are not rescued with OA (n=3). Collectively, these results suggest that SCD exerts its positive regulatory effect at the level upstream of ILK in both HSCs and TICs.



**Fig. S5**

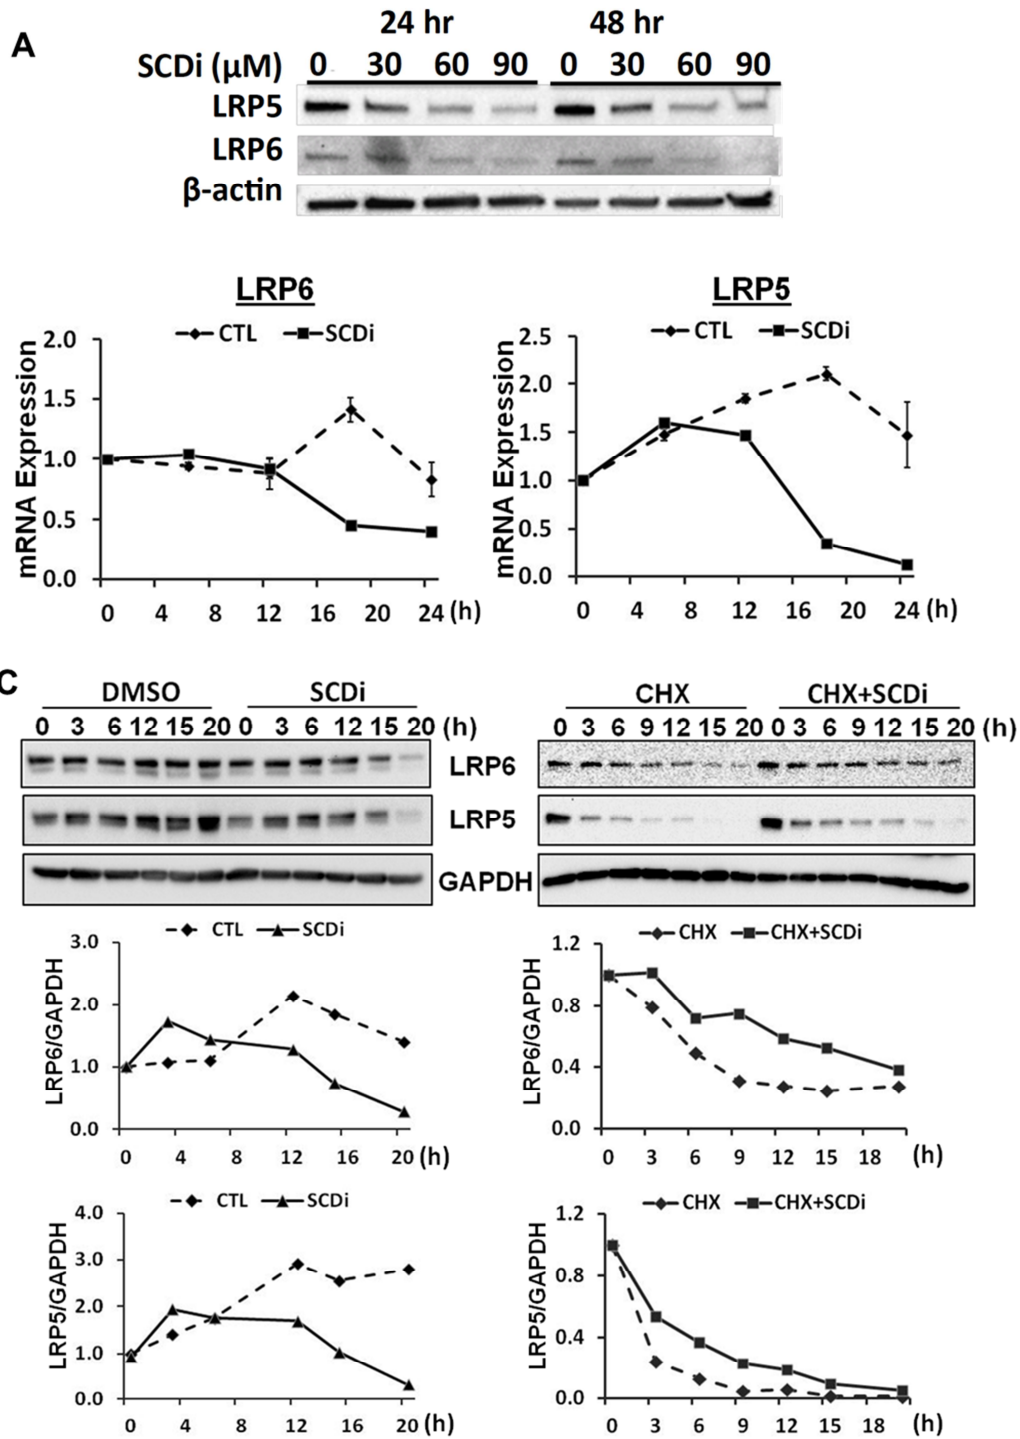

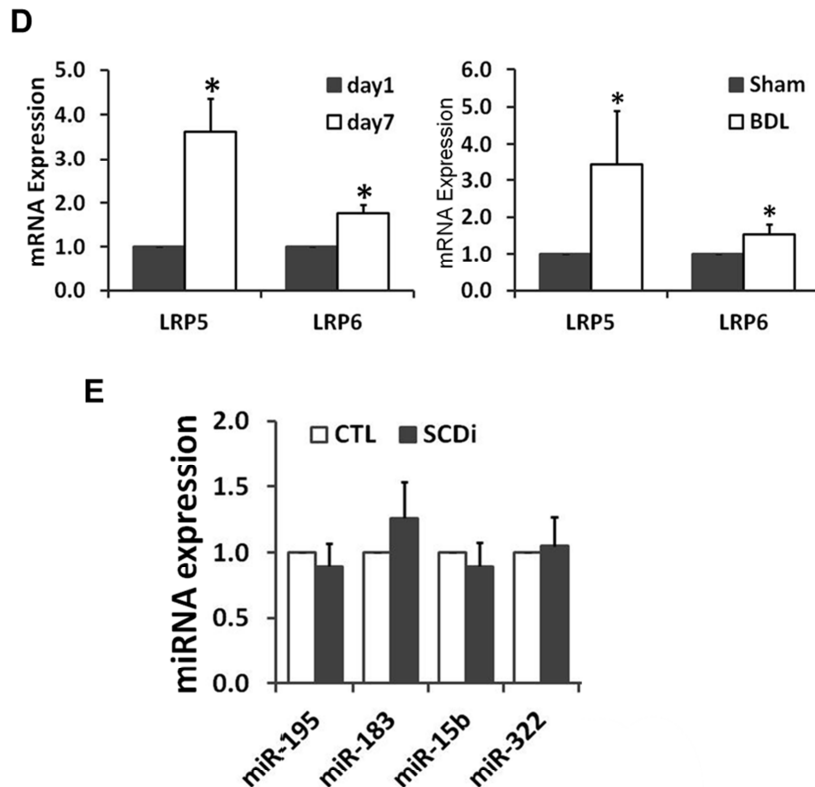

**Fig. S5. SCD promotes LRP5/6 expression.** A. LRP5/6 repression is evident in SCDi-treated Huh7 cells, similar to what is observed with BSC. B. LRP5 and LRP6 mRNA levels begin to decrease after 12 h of SCDi treatment in BSC. C. Temporal changes in LRP5 and LRP6 proteins were assessed in SCDi- or vehicle (DMSO)-treated BSCs with (right panel) or without (left panel) concomitant treatment with cyclohexamide (CHX, 10 ng/ml). Data from densitometric analysis of LRP5 and LRP6 standardized to GAPDH, are shown in lower graphs of corresponding panels. Without CHX (left panel), SCDi begins to suppress LRP5/6 levels at 12 h after addition of SCDi and progressively depletes both proteins until 20 h. With CHX, both proteins are rapidly degraded until they reach maximally reduced levels at 9 h or thereafter. But the degradation kinetic is not enhanced but rather attenuated with SCDi. D. Induction of *Lrp5/6* mRNA in culture- and BDL-activated HSCs confirms functional relevance of these mediators of canonical Wnt pathway in HSC activation. Induction of *Lrp5* and *Lrp6* mRNA levels in activated rat HSCs at day 7 of culture on plastic as quantified by qPCR analysis vs. in quiescent HSCs at day 1 of culture (left panel) (n=3). Similarly, induction of *Lrp5* and *Lrp6* mRNA levels in HSCs isolated from rat livers with biliary liver fibrosis (BDL) vs. in HSCs from control livers (Sham) (right panel) (n=3). E. In-silico algorithms (<http://mirdb.org/miRDB/>) for screening possible miRNA binding to *Lrp6* mRNA 3' UTR predict possible regulation by miR-195, miR-183, miR-15b, and miR-322. But none of these are regulated with SCDi treatment for 15 h as determined by TaqMan-qPCR in BSCs.

**Fig. S6**

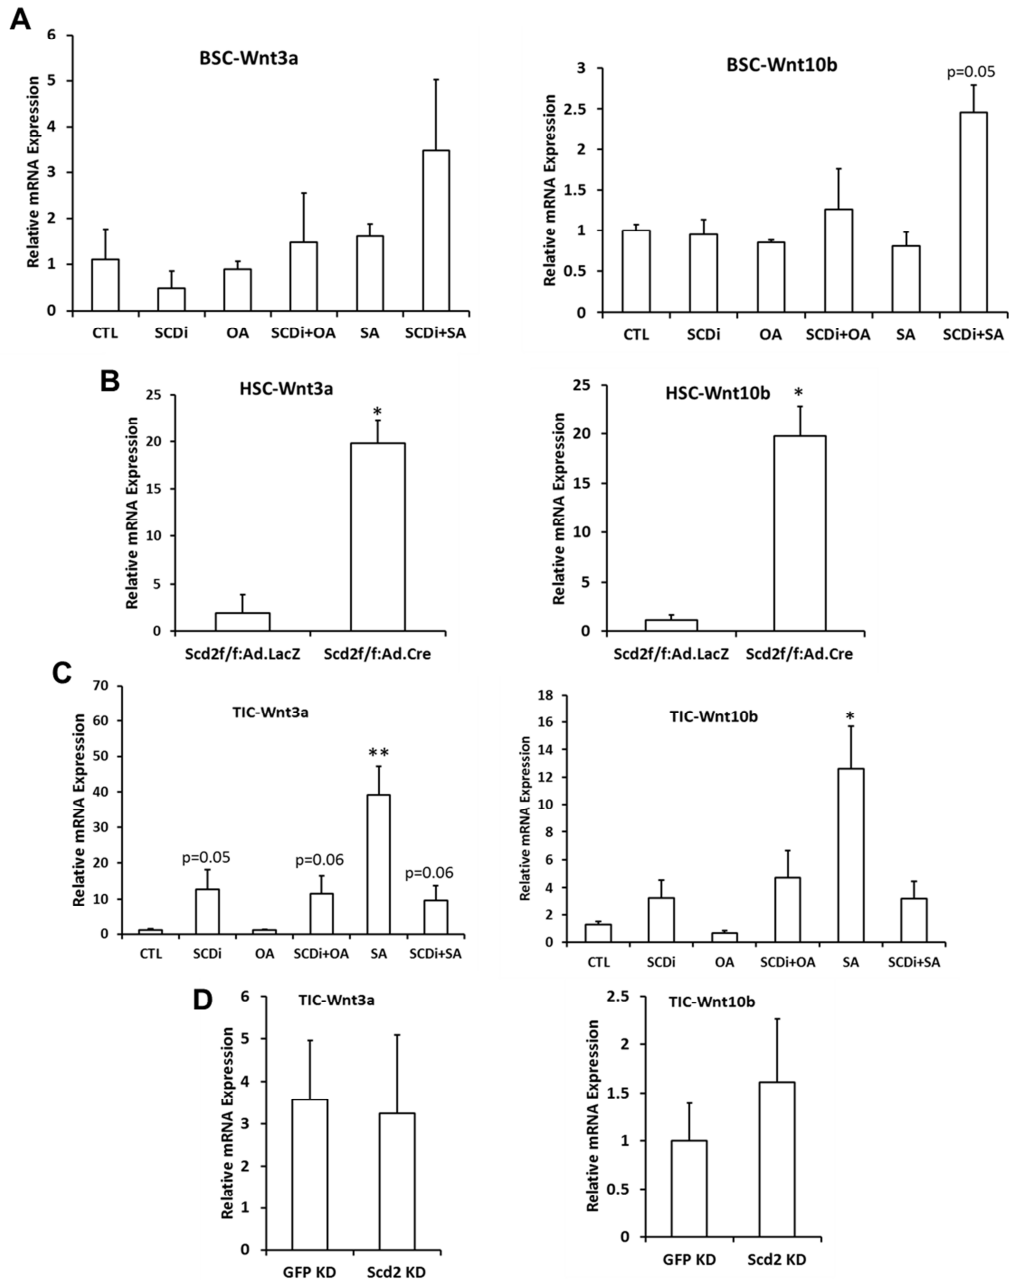

**Fig. S6. Unclear effect of SCD inhibition or Scd2 KD on canonical Wnt3a and Wnt10b in BSCs, HSCs, and TICs.** A. SCDi+SA tends to increase Wnts3a and 10b in BSC (n=4). B. Scd2 KD induces Wnts3a and 10b in Scd2f/f;Ad.Cre HSCs (n=3). C. SA induces Wnts 3a and 10b in TICs (n=3). D. Scd2 KD does not appear to affect Wnts3a and 10b in TICs (n=3). Error bars represent SEM.

**Fig. S7**

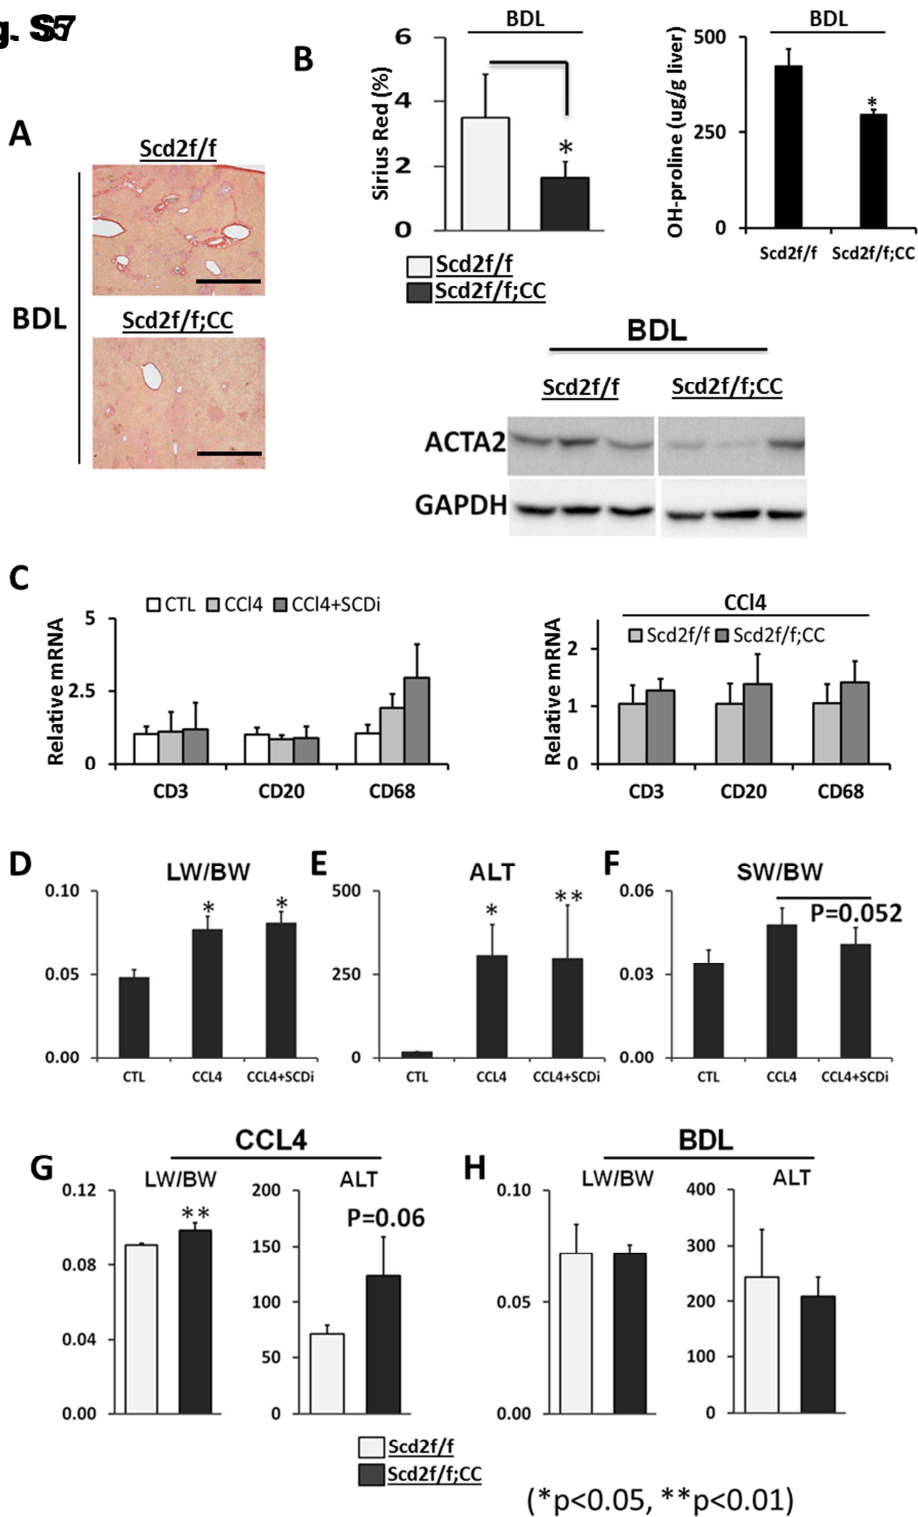

**Fig. S7. HSC-specific *Scd2* deletion (*Scd2<sup>flox/flox</sup>:CC*) ameliorates liver fibrosis in BDL mouse model.** A. *Scd2<sup>flox/flox</sup>:CC* vs. *Scd2<sup>flox/flox</sup>* (control) mice were subjected to BDL and euthanized 12 d later. Fibrosis is suppressed in livers of HSC-specific *Scd2* deleted BDL mice

vs control BDL mice, as evidence by decreased Sirius Red staining. B. HSC-specific *Scd2* deleted mice (n=5) show reduced liver fibrosis as assessed by morphometry for Sirius red and hydroxyproline content (top), and decreased hepatic levels of  $\alpha$ -smooth muscle actin (*Acta2*) (bottom). C. Major immune cell subsets of T-, B-, and myeloid cells were assessed by qPCR for CD3, CD20, CD68, respectively, of liver tissues from CCl4 models of fibrosis, but no difference was found between groups with or without SCD suppression. (n=6.) D, E, and F. SCDi treatment does not affect liver weight/body weight ratio or plasma ALT levels in CCl4-treated mice but tends to reduce spleen weight/body weight ratio, suggesting the treatment unlikely influenced underlying toxic injury, yet still reduced the severity of liver fibrosis and splenomegaly. (n=6.) G and H. *Scd2* gene ablation (*Scd2*flox/flox:CC) increases liver weight/body weight ratio and plasma ALT in the CCl4 model but not in BDL model, indicating worsened CCl4 hepatotoxicity due to *Scd2* deficiency in HSCs. (n=5-6.) Error bars represent SEM (B,D-H).

## Supplemental Tables

**Table S1 – GENE LIST:** A list of genes commonly suppressed by at least 1.75 fold in cultured primary rat hepatic stellate cells across Dkk1, ICG-001, and FJ9 treatments (Tx), and ordered by mean fold change (FC) of all 3 treatments. Seven-day cultured hepatic stellate cells were infected with an adenovirus expressing DKK-1 or GFP; or treated with FJ9, ICG-001, or respective vehicle for 24 hr in serum-free DMEM. Total RNA extracted was analyzed by Affymetrix Rat Gene 1.0 ST Array kit according to the manufacturer's protocol. (--- = unidentified)

| Probeset ID | Gene Symbol        | Gene Name                                    | Dkk1 Tx FC | ICG Tx FC | FJ9 Tx FC | Mean FC for 3 Tx |
|-------------|--------------------|----------------------------------------------|------------|-----------|-----------|------------------|
| 10753425    | Mx1                | myxovirus (influenza virus) resistance 1     | -9.39      | -11.61    | -16.26    | -12.42           |
| 10715546    | Scd2               | stearoyl-Coenzyme A desaturase 2             | -2.34      | -2.56     | -19.69    | -8.20            |
| 10934865    | Srpx2 (predicted)  | sushi-repeat-containing protein, X-linked 2  | -2.73      | -11.87    | -9.31     | -7.97            |
| 10819500    | ---                | ---                                          | -4.85      | -5.69     | -12.28    | -7.61            |
| 10928837    | Igfbp5             | insulin-like growth factor binding protein 5 | -10.91     | -4.71     | -4.13     | -6.58            |
| 10908521    | Ldlr               | low density lipoprotein receptor             | -2.21      | -1.77     | -14.89    | -6.29            |
| 10791358    | Ddx60              | DEAD (Asp-Glu-Ala-Asp) box polypeptide 60    | -4.96      | -3.41     | -9.78     | -6.05            |
| 10709687    | Olfml1             | olfactomedin-like 1                          | -2.79      | -1.91     | -13.30    | -6.00            |
| 10765444    | ---                | ---                                          | -8.09      | -7.40     | -2.42     | -5.97            |
| 10851350    | Tgm2               | transglutaminase 2, C polypeptide            | -3.00      | -3.30     | -11.52    | -5.94            |
| 10857382    | Fgd5 (predicted)   | FYVE, RhoGEF and PH domain containing 5      | -3.14      | -6.98     | -7.70     | -5.94            |
| 10728631    | Fads2              | fatty acid desaturase 2                      | -3.42      | -5.81     | -8.39     | -5.87            |
| 10799241    | Idi1               | isopentenyl-diphosphate delta isomerase      | -1.89      | -3.65     | -11.86    | -5.80            |
| 10787889    | Ddx60              | DEAD (Asp-Glu-Ala-Asp) box polypeptide 60    | -5.21      | -3.27     | -8.80     | -5.76            |
| 10711979    | Gpr123 (predicted) | G protein-coupled receptor 123               | -2.61      | -7.15     | -6.37     | -5.38            |
| 10764244    | Tnnt2              | troponin T2, cardiac                         | -2.82      | -9.59     | -3.52     | -5.31            |
| 10791394    | ---                | ---                                          | -4.58      | -2.75     | -8.36     | -5.23            |
| 10801975    | MGC108823          | similar to interferon-inducible GTPase       | -5.86      | -3.58     | -6.12     | -5.19            |
| 10769672    | Rgs4               | regulator of G-protein signaling 4           | -6.56      | -5.53     | -3.44     | -5.18            |
| 10792344    | Sfrp1              | secreted frizzled-related protein 1          | -3.39      | -4.78     | -7.28     | -5.15            |
| 10826249    | Vcam1              | vascular cell adhesion molecule 1            | -7.05      | -3.86     | -4.25     | -5.05            |
| 10730349    | Scd1               | stearoyl-Coenzyme A desaturase 1             | -4.42      | -6.40     | -4.27     | -5.03            |
| 10793080    | Gdf2               | growth differentiation factor 2              | -5.74      | -2.81     | -6.47     | -5.01            |

|          |                        |                                                         |       |       |       |       |
|----------|------------------------|---------------------------------------------------------|-------|-------|-------|-------|
| 10733056 | Ifi47                  | interferon gamma inducible protein 47                   | -4.17 | -4.40 | -6.15 | -4.91 |
| 10889399 | Rsad2                  | radical S-adenosyl methionine domain containing 2       | -4.12 | -3.20 | -7.18 | -4.83 |
| 10714745 | Il33                   | interleukin 33                                          | -3.81 | -3.67 | -6.96 | -4.81 |
| 10823949 | Lrat                   | lecithin-retinol acyltransferase                        | -2.38 | -2.70 | -8.93 | -4.67 |
| 10929458 | Sphkap                 | SPHK1 interactor, AKAP domain containing                | -3.50 | -3.39 | -7.03 | -4.64 |
| 10886621 | Serpina3n              | serine (or cysteine) peptidase inhibitor, clade A, mem  | -8.59 | -2.45 | -2.77 | -4.60 |
| 10859090 | LOC689800              | similar to osteoclast inhibitory lectin                 | -3.45 | -5.25 | -4.98 | -4.56 |
| 10825559 | LOC690430              | similar to nuclear receptor subfamily 1, grou           | -4.98 | -5.03 | -3.64 | -4.55 |
| 10765437 | Rgs5                   | regulator of G-protein signaling 5                      | -7.34 | -4.15 | -2.08 | -4.53 |
| 10764005 | Plekha6 (predicted)    | pleckstrin homology domain containing, family           | -3.71 | -2.42 | -7.34 | -4.49 |
| 10813214 | Hmgcs1                 | 3-hydroxy-3-methylglutaryl-Coenzyme A synthase 1        | -2.25 | -3.01 | -8.07 | -4.44 |
| 10937725 | Figf                   | c-fos induced growth factor                             | -3.04 | -2.97 | -6.77 | -4.26 |
| 10702913 | Fndc1                  | fibronectin type III domain containing 1                | -2.81 | -1.76 | -7.99 | -4.18 |
| 10728123 | Tm7sf2                 | transmembrane 7 superfamily member 2                    | -3.63 | -6.14 | -2.41 | -4.06 |
| 10702945 | Acat2                  | acetyl-Coenzyme A acetyltransferase 2                   | -2.57 | -3.14 | -6.32 | -4.01 |
| 10895083 | Lum                    | lumican                                                 | -3.63 | -2.44 | -5.84 | -3.97 |
| 10866512 | Mgp                    | matrix Gla protein                                      | -4.31 | -4.51 | -3.00 | -3.94 |
| 10763604 | Gpr39                  | G protein-coupled receptor 39                           | -2.23 | -3.41 | -5.65 | -3.77 |
| 10858165 | Cxcl12                 | chemokine (C-X-C motif) ligand 12                       | -2.72 | -2.22 | -6.22 | -3.72 |
| 10755088 | Rtp4 (predicted)       | receptor transporter protein 4                          | -3.88 | -2.47 | -4.64 | -3.66 |
| 10742868 | LOC686661              | similar to CG1998-PA                                    | -3.71 | -2.31 | -4.84 | -3.62 |
| 10870567 | Dhcr24                 | 24-dehydrocholesterol reductase                         | -2.71 | -3.22 | -4.67 | -3.53 |
| 10722247 | E2f8                   | E2F transcription factor 8                              | -5.08 | -2.90 | -2.61 | -3.53 |
| 10749762 | Sectm1b                | secreted and transmembrane 1B                           | -4.16 | -3.84 | -2.58 | -3.53 |
| 10758777 | Oas1a                  | 2'-5' oligoadenylate synthetase 1A                      | -3.26 | -2.12 | -5.17 | -3.52 |
| 10796683 | RGD1563437 (predicted) | similar to KIAA1217                                     | -1.97 | -2.41 | -6.12 | -3.50 |
| 10861811 | RGD1308013 (predicted) | similar to hypothetical protein B230314O                | -5.87 | -1.93 | -2.66 | -3.49 |
| 10861835 | Ptn                    | pleiotrophin                                            | -3.10 | -5.50 | -1.81 | -3.47 |
| 10827094 | Gbp1 (predicted)       | guanylate binding protein 1, interferon-                | -3.29 | -1.76 | -5.30 | -3.45 |
| 10883960 | Cmpk2                  | cytidine monophosphate (UMP-CMP) kinase 2, mitochondria | -3.93 | -3.29 | -3.06 | -3.43 |
| 10737205 | Sept4                  | septin 4                                                | -1.88 | -2.29 | -5.87 | -3.35 |

|          |                     |                                                           |       |       |       |       |
|----------|---------------------|-----------------------------------------------------------|-------|-------|-------|-------|
| 10708896 | Garp (predicted)    | glycoprotein A repetitions predominant                    | -2.50 | -1.76 | -5.77 | -3.34 |
| 10841348 | Acss2 (predicted)   | acyl-CoA synthetase short-chain family member             | -2.79 | -3.76 | -3.36 | -3.30 |
| 10796679 | LOC681362           | similar to p130Cas-associated protein (p140Cap) (SN       | -1.89 | -2.16 | -5.86 | -3.30 |
| 10819005 | Elov16              | ELOVL family member 6, elongation of long chain fatty aci | -1.81 | -3.93 | -4.14 | -3.29 |
| 10714903 | Ifit3               | interferon-induced protein with tetratricopeptide repea   | -4.02 | -3.04 | -2.78 | -3.28 |
| 10757726 | Eln                 | elastin                                                   | -3.40 | -4.43 | -1.99 | -3.27 |
| 10909639 | Fxyd6               | FXVD domain-containing ion transport regulator 6          | -3.04 | -2.35 | -4.38 | -3.25 |
| 10713857 | Fads1               | fatty acid desaturase 1                                   | -3.48 | -2.97 | -3.29 | -3.25 |
| 10861678 | Plxna4 (predicted)  | plexin A4                                                 | -3.21 | -3.69 | -2.81 | -3.24 |
| 10714907 | Ifit1               | interferon-induced protein with tetratricopeptide repeats | -1.86 | -2.18 | -5.65 | -3.23 |
| 10770807 | G0s2                | G0/G1 switch gene 2                                       | -5.05 | -2.50 | -2.11 | -3.22 |
| 10911797 | Gsta4               | glutathione S-transferase, alpha 4                        | -5.14 | -2.52 | -1.80 | -3.15 |
| 10731047 | Ablim1 (predicted)  | actin-binding LIM protein 1                               | -2.45 | -2.64 | -4.33 | -3.14 |
| 10888953 | Emilin1 (predicted) | elastin microfibril interfacier 1                         | -2.02 | -3.14 | -4.24 | -3.14 |
| 10857358 | Fgd5 (predicted)    | FYVE, RhoGEF and PH domain containing 5                   | -2.31 | -3.49 | -3.54 | -3.11 |
| 10762747 | Oasl2               | 2'-5' oligoadenylate synthetase-like 2                    | -3.06 | -2.14 | -4.14 | -3.11 |
| 10751295 | Pla1a               | phospholipase A1 member A                                 | -4.06 | -1.78 | -3.44 | -3.09 |
| 10776459 | Pdgfra              | platelet derived growth factor receptor, alpha polypeptid | -2.42 | -4.26 | -2.51 | -3.06 |
| 10771655 | Cxcl10              | chemokine (C-X-C motif) ligand 10                         | -3.78 | -2.15 | -3.21 | -3.05 |
| 10712560 | Dhcr7               | 7-dehydrocholesterol reductase                            | -2.80 | -2.21 | -4.05 | -3.02 |
| 10912088 | Nt5e                | 5' nucleotidase, ecto                                     | -3.64 | -3.35 | -1.98 | -2.99 |
| 10749768 | Sectm1a             | secreted and transmembrane 1A                             | -4.84 | -2.09 | -1.99 | -2.97 |
| 10882525 | Tmem178             | transmembrane protein 178                                 | -2.71 | -3.41 | -2.76 | -2.96 |
| 10880095 | Serinc2             | serine incorporator 2                                     | -3.68 | -3.26 | -1.93 | -2.95 |
| 10913095 | Ube1l (predicted)   | ubiquitin-activating enzyme E1-like                       | -4.66 | -2.24 | -1.92 | -2.94 |
| 10866724 | Abcc9               | ATP-binding cassette, sub-family C (CFTR/MRP), member 9   | -3.03 | -1.83 | -3.91 | -2.92 |
| 10832378 | Lss                 | lanosterol synthase                                       | -2.09 | -3.16 | -3.49 | -2.91 |
| 10929766 | Col6a3 (predicted)  | procollagen, type VI, alpha 3                             | -3.29 | -3.19 | -2.24 | -2.91 |
| 10769680 | Hsd17b7             | hydroxysteroid (17-beta) dehydrogenase 7                  | -2.40 | -2.38 | -3.93 | -2.91 |
| 10896772 | Sqle                | squalene epoxidase                                        | -2.22 | -2.28 | -4.13 | -2.88 |
| 10763976 | Plekha6             | pleckstrin homology domain                                | -3.02 | -1.81 | -3.81 | -2.88 |



|          |                        |                                                            |       |       |       |       |
|----------|------------------------|------------------------------------------------------------|-------|-------|-------|-------|
|          | (predicted)            | containing                                                 |       |       |       |       |
| 10917205 | ---                    | ---                                                        | -3.38 | -1.80 | -3.46 | -2.88 |
| 10912051 | Prss35                 | protease, serine, 35                                       | -2.42 | -2.18 | -3.98 | -2.86 |
| 10749340 | St6galnac1             | ST6 (alpha-N-acetylneuraminyl-2,3-beta-galactosyl          | -2.01 | -1.98 | -4.59 | -2.86 |
| 10932610 | RGD1561594 (predicted) | similar to testis-specific farnesyl pyropho                | -1.87 | -2.67 | -4.04 | -2.86 |
| 10827809 | RT1-S3                 | RT1 class Ib, locus S3                                     | -3.04 | -2.12 | -3.41 | -2.85 |
| 10823093 | Osap                   | ovary-specific acidic protein                              | -2.73 | -2.86 | -2.95 | -2.85 |
| 10702955 | RGD1562948 (predicted) | similar to Ab2-076                                         | -2.49 | -2.51 | -3.54 | -2.85 |
| 10927842 | Stat1                  | signal transducer and activator of transcription 1         | -2.89 | -1.92 | -3.67 | -2.82 |
| 10853931 | LOC500046              | similar to hypothetical protein FLJ21986                   | -2.89 | -2.43 | -3.08 | -2.80 |
| 10860597 | Steap4                 | STEAP family member 4                                      | -2.46 | -2.02 | -3.91 | -2.80 |
| 10724902 | Mrvi1 (predicted)      | MRV integration site 1 homolog (mouse)                     | -2.12 | -2.45 | -3.79 | -2.78 |
| 10889446 | ---                    | ---                                                        | -4.31 | -1.98 | -2.05 | -2.78 |
| 10759989 | RGD1307396 (predicted) | similar to RIKEN cDNA 6330406I15                           | -2.46 | -1.93 | -3.92 | -2.77 |
| 10753279 | Erg                    | avian erythroblastosis virus E-26 (v-ets) oncogene related | -2.95 | -2.08 | -3.29 | -2.77 |
| 10744597 | LOC691995              | hypothetical protein LOC691995                             | -3.43 | -3.04 | -1.81 | -2.76 |
| 10855416 | Tmem176a               | transmembrane protein 176A                                 | -2.81 | -2.81 | -2.62 | -2.75 |
| 10743774 | Ntn1                   | netrin 1                                                   | -2.23 | -1.96 | -4.00 | -2.73 |
| 10759198 | Cmklr1                 | chemokine-like receptor 1                                  | -1.96 | -1.86 | -4.33 | -2.71 |
| 10813872 | Cdh18 (predicted)      | cadherin 18, type 2                                        | -2.56 | -2.03 | -3.51 | -2.70 |
| 10881424 | Tnfrsf1b               | tumor necrosis factor receptor superfamily, member 1b      | -3.72 | -2.39 | -1.97 | -2.69 |
| 10754563 | Itgb5                  | integrin, beta 5                                           | -2.37 | -2.25 | -3.45 | -2.69 |
| 10760080 | Rasl11a                | RAS-like family 11 member A                                | -2.69 | -1.96 | -3.36 | -2.67 |
| 10729377 | Mamdc2                 | MAM domain containing 2                                    | -3.73 | -2.50 | -1.77 | -2.67 |
| 10756418 | Flt1                   | FMS-like tyrosine kinase 1                                 | -3.04 | -2.34 | -2.61 | -2.67 |
| 10823278 | Tm4sf1 (predicted)     | transmembrane 4 superfamily member 1                       | -1.94 | -1.84 | -4.14 | -2.64 |
| 10929321 | RGD1561963 (predicted) | similar to Dedicator of cytokinesi                         | -2.91 | -2.21 | -2.77 | -2.63 |
| 10804567 | Synpo                  | synaptopodin                                               | -2.25 | -2.56 | -3.06 | -2.62 |
| 10853471 | Cyp51                  | cytochrome P450, subfamily 51                              | -1.86 | -2.10 | -3.86 | -2.61 |
| 10932891 | LOC681355              | similar to potassium channel tetramerisation               | -2.91 | -2.05 | -2.86 | -2.61 |
| 10855727 | Adcyap1r1              | adenylate cyclase activating polypeptide 1 receptor 1      | -3.02 | -2.31 | -2.43 | -2.59 |
| 10839598 | RGD1304904 (predicted) | similar to mitochondrial glycerol                          | -3.27 | -2.14 | -2.35 | -2.58 |
| 10765600 | F11r                   | F11 receptor                                               | -2.85 | -2.16 | -2.73 | -2.58 |
| 10735891 | RGD1562631 (predicted) | similar to RIKEN cDNA 2010305C02                           | -3.02 | -2.19 | -2.52 | -2.57 |

|          |                        |                                                          |       |       |       |       |
|----------|------------------------|----------------------------------------------------------|-------|-------|-------|-------|
| 10739927 | C1qtnf1                | CIq and tumor necrosis factor related protein 1          | -2.24 | -2.91 | -2.52 | -2.56 |
| 10751469 | Parp14                 | poly (ADP-ribose) polymerase family, member 14           | -2.46 | -1.95 | -3.18 | -2.53 |
| 10798135 | Serpinb9               | serine (or cysteine) peptidase inhibitor, clade B, m     | -2.53 | -2.45 | -2.60 | -2.53 |
| 10714353 | Tmem2 (predicted)      | transmembrane protein 2                                  | -3.36 | -1.82 | -2.33 | -2.50 |
| 10759177 | Tmem119                | transmembrane protein 119                                | -1.93 | -1.91 | -3.65 | -2.50 |
| 10912277 | LOC367140              | similar to Heterogeneous nuclear ribonucleoprotein A1    | -1.84 | -3.30 | -2.35 | -2.50 |
| 10704728 | Dmpk (predicted)       | dystrophia myotonica-protein kinase                      | -1.76 | -3.08 | -2.65 | -2.50 |
| 10799548 | Ccdc3                  | coiled-coil domain containing 3                          | -2.90 | -2.21 | -2.28 | -2.46 |
| 10897405 | Apol3                  | apolipoprotein L, 3                                      | -3.06 | -2.04 | -2.24 | -2.45 |
| 10777468 | Ablim2                 | actin-binding LIM protein 2                              | -2.82 | -2.33 | -2.15 | -2.43 |
| 10862403 | Rarres2                | retinoic acid receptor responder (tazarotene induced)    | -3.36 | -1.80 | -2.15 | -2.43 |
| 10702194 | Tmem200a               | transmembrane protein 200A                               | -1.81 | -2.90 | -2.59 | -2.43 |
| 10738972 | Mrc2                   | mannose receptor, C type 2                               | -2.33 | -2.24 | -2.72 | -2.43 |
| 10921532 | Ptk7 (predicted)       | PTK7 protein tyrosine kinase 7                           | -3.46 | -1.96 | -1.86 | -2.42 |
| 10859117 | ---                    | ---                                                      | -2.60 | -2.05 | -2.60 | -2.41 |
| 10838242 | Wt1                    | Wilms tumor 1                                            | -3.04 | -2.42 | -1.77 | -2.41 |
| 10738391 | Aoc3                   | amine oxidase, copper containing 3                       | -1.98 | -2.97 | -2.26 | -2.40 |
| 10726172 | Fgfr2                  | fibroblast growth factor receptor 2                      | -2.32 | -1.98 | -2.90 | -2.40 |
| 10729009 | Dtx4                   | deltex 4 homolog (Drosophila)                            | -2.33 | -2.00 | -2.85 | -2.40 |
| 10853554 | Gng11                  | guanine nucleotide binding protein (G protein), gamma 11 | -1.91 | -2.09 | -3.13 | -2.38 |
| 10813445 | Lifr                   | leukemia inhibitory factor receptor                      | -2.82 | -1.82 | -2.47 | -2.37 |
| 10766835 | Plxna2 (predicted)     | plexin A2                                                | -2.74 | -1.89 | -2.42 | -2.35 |
| 10734242 | Mfap4                  | microfibrillar-associated protein 4                      | -2.71 | -2.21 | -2.05 | -2.32 |
| 10839596 | Adra2b                 | adrenergic receptor, alpha 2b                            | -2.65 | -1.77 | -2.43 | -2.28 |
| 10919422 | Acpl2                  | acid phosphatase-like 2                                  | -1.94 | -2.02 | -2.89 | -2.28 |
| 10803991 | Cd14                   | CD14 antigen                                             | -1.86 | -2.17 | -2.77 | -2.27 |
| 10708521 | Ctsc                   | cathepsin C                                              | -3.23 | -1.80 | -1.77 | -2.27 |
| 10898968 | Pfkm                   | phosphofructokinase, muscle                              | -1.99 | -2.64 | -2.16 | -2.27 |
| 10878210 | Kank4                  | KN motif and ankyrin repeat domains 4                    | -2.38 | -2.42 | -1.99 | -2.26 |
| 10802338 | Ccbe1 (predicted)      | collagen and calcium binding EGF domain                  | -2.51 | -2.21 | -2.02 | -2.25 |
| 10777232 | Cd38                   | CD38 antigen                                             | -2.25 | -1.82 | -2.63 | -2.23 |
| 10891297 | RGD1310769 (predicted) | similar to HSPC288                                       | -1.90 | -2.19 | -2.57 | -2.22 |

|          |                    |                                                            |       |       |       |       |
|----------|--------------------|------------------------------------------------------------|-------|-------|-------|-------|
| 10810591 | Fhod1              | formin homology 2 domain containing 1                      | -2.03 | -2.09 | -2.49 | -2.20 |
| 10866718 | Kcnj8              | potassium inwardly-rectifying channel, subfamily J, member | -2.38 | -1.77 | -2.40 | -2.18 |
| 10844248 | ---                | ---                                                        | -2.18 | -2.13 | -2.22 | -2.18 |
| 10729777 | Ch25h              | cholesterol 25-hydroxylase                                 | -2.61 | -1.95 | -1.97 | -2.18 |
| 10931154 | Dbi                | diazepam binding inhibitor                                 | -1.88 | -2.17 | -2.46 | -2.17 |
| 10883903 | Rrm2               | ribonucleotide reductase M2                                | -2.39 | -2.21 | -1.86 | -2.15 |
| 10775731 | Cxcl13             | chemokine (C-X-C motif) ligand 13                          | -2.06 | -2.01 | -2.35 | -2.14 |
| 10762740 | Oasl1              | 2'-5' oligoadenylate synthetase-like 1                     | -1.90 | -2.55 | -1.94 | -2.13 |
| 10825665 | Capza1             | capping protein (actin filament) muscle Z-line, alpha      | -2.29 | -1.92 | -2.16 | -2.12 |
| 10757129 | Pdgfa              | platelet derived growth factor, alpha                      | -2.21 | -1.84 | -2.26 | -2.11 |
| 10817057 | S100a4             | S100 calcium-binding protein A4                            | -1.77 | -2.24 | -2.27 | -2.10 |
| 10760290 | Nptx2              | neuronal pentraxin 2                                       | -1.89 | -2.13 | -2.27 | -2.10 |
| 10935031 | MGC109340          | similar to Microsomal signal peptidase 23 kDa subunit      | -2.10 | -1.82 | -2.30 | -2.07 |
| 10769825 | Fcer1g             | Fc receptor, IgE, high affinity I, gamma polypep           | -2.35 | -1.78 | -2.05 | -2.06 |
| 10729825 | Htr7               | 5-hydroxytryptamine (serotonin) receptor 7                 | -1.77 | -2.05 | -2.31 | -2.05 |
| 10732750 | Slit3              | slit homolog 3 (Drosophila)                                | -1.86 | -2.32 | -1.94 | -2.04 |
| 10810144 | Rrm2               | ribonucleotide reductase M2                                | -2.02 | -2.25 | -1.85 | -2.04 |
| 10786710 | Btd                | biotinidase                                                | -1.86 | -2.24 | -1.93 | -2.01 |
| 10860372 | ---                | ---                                                        | -2.27 | -1.78 | -1.93 | -1.99 |
| 10891880 | Prima1 (predicted) | proline rich membrane anchor 1                             | -2.02 | -2.08 | -1.86 | -1.99 |
| 10724131 | Il18bp             | interleukin 18 binding protein                             | -2.31 | -1.80 | -1.80 | -1.97 |
| 10826828 | Hadh               | hydroxyacyl-Coenzyme A dehydrogenase                       | -2.16 | -1.75 | -1.99 | -1.97 |
| 10765105 | ---                | ---                                                        | -1.79 | -2.09 | -1.94 | -1.94 |
| 10930738 | Oit3               | oncprotein induced transcript 3                            | -1.85 | -1.87 | -2.09 | -1.94 |
| 10851599 | Sdc4               | syndecan 4                                                 | -1.82 | -1.82 | -2.09 | -1.91 |
| 10870261 | Ak3l1              | adenylate kinase 3-like 1                                  | -1.88 | -1.97 | -1.88 | -1.91 |
| 10744709 | Smtnl2             | smoothelin-like 2                                          | -1.95 | -1.81 | -1.90 | -1.89 |
| 10766760 | LOC679692          | similar to lysophosphatidylglycerol acyltransferase        | -1.78 | -1.82 | -1.92 | -1.84 |
| 10862649 | Nod1               | nucleotide-binding oligomerization domain containing 1     | -1.87 | -1.77 | -1.79 | -1.81 |
| 10829713 | Bicc1 (predicted)  | bicaudal C homolog 1                                       | -1.88 | -1.76 | -1.78 | -1.81 |
| 10907952 | Tmem123            | transmembrane protein 123                                  | -1.77 | -1.77 | -1.79 | -1.78 |

**Table S2 – FATTY ACID CONTENT:** Fatty acid content in total lipid extracts from day 1 quiescent and day 7 activated cultured HSCs. Fatty acids are quantified by GC/MS with heptadecanoic acid (17:0) as an internal standard. Data are presented as mean  $\pm$  SD of nmol/million cells of the fatty acids. \*  $p < 0.05$  comparing to Day 1 cells; #  $p < 0,05$  compared to solvent control treatment.

| Fatty Acid  | Day 1 HSCs<br>(nmol/million cells) | Day 7 HSCs (nmol/million cells) |                    |                    |
|-------------|------------------------------------|---------------------------------|--------------------|--------------------|
|             |                                    | Control                         | Solvent control    | FJ9 (200uM)        |
| C14:0       | 1.41 $\pm$ 0.05                    | 9.18 $\pm$ 1.22 *               | 7.96 $\pm$ 1.26    | 3.59 $\pm$ 1.13 #  |
| C16:0       | 371.9 $\pm$ 79.8                   | 721.1 $\pm$ 166.4 *             | 563.5 $\pm$ 153.7  | 347.6 $\pm$ 160.2  |
| C16:1 (n-7) | 2.21 $\pm$ 0.16                    | 19.38 $\pm$ 3.35 *              | 17.21 $\pm$ 2.74 * | 4.05 $\pm$ 2.31 #  |
| C18:0       | 94.3 $\pm$ 16.8                    | 258.8 $\pm$ 41.3 *              | 214.5 $\pm$ 12.5 * | 137.3 $\pm$ 45.5 # |
| C18:1 (n-9) | 24.8 $\pm$ 3.56                    | 145.3 $\pm$ 39.1 *              | 121.3 $\pm$ 35.9 * | 38.6 $\pm$ 20.5 #  |
| C18:1 (n-7) | 11.9 $\pm$ 1.76                    | 65.9 $\pm$ 21.1 *               | 40.5 $\pm$ 2.58 *  | 22.6 $\pm$ 13.9 #  |
| C18:2 (n-6) | 26.8 $\pm$ 3.10                    | 45.7 $\pm$ 12.9 *               | 34.8 $\pm$ 9.86    | 18.3 $\pm$ 10.4    |
| C20:0       | 0.40 $\pm$ 0.05                    | 3.11 $\pm$ 1.21 *               | 2.19 $\pm$ 0.14 *  | 1.30 $\pm$ 0.76    |
| C20:4 (n-6) | 16.7 $\pm$ 1.29                    | 88.9 $\pm$ 35.1 *               | 63.8 $\pm$ 13.8 *  | 29.9 $\pm$ 17.4 #  |
| C22:0       | 0.45 $\pm$ 0.13                    | 2.75 $\pm$ 0.67 *               | 2.37 $\pm$ 0.35 *  | 1.19 $\pm$ 0.29 #  |
| C22:1       | 0.40 $\pm$ 0.06                    | 4.49 $\pm$ 1.23                 | 4.68 $\pm$ 0.38    | 1.43 $\pm$ 0.17    |
| C24:0       | 0.63 $\pm$ 0.29                    | 7.01 $\pm$ 1.43 *               | 4.81 $\pm$ 1.32 *  | 1.24 $\pm$ 0.83 #  |

## Supplemental Methods

**Human liver biopsy tissues and human hepatocytes.** Human liver biopsy tissues were obtained from Histopathology and Tissue Shared Resource, Georgetown University, and tissues were immunohistochemically stained and semi-quantitatively assessed for SCD as previously described<sup>5</sup>. Human hepatocytes from liver donors were isolated as previously described<sup>6</sup> and obtained from Pharmacology, Toxicology and Therapeutics Dept, University of Kansas Medical Center.

**Patient cohort for bioinformatics analysis of gene expression profiling data to correlate SCD expression with clinical outcome in HCC at the population level.** The cohort of HCC patients (n=242) used for our bioinformatics analysis has previously been clinically characterized<sup>7</sup> with >90% of patients suffering from hepatitis B virus infection which is the most frequent cause of HCC worldwide.

**BSC line.** A spontaneously immortalized HSC line, designated as BSC, was established from activated HSC isolated from experimental biliary liver fibrosis as previously described<sup>8</sup> and maintained in low glucose DMEM with 5% FBS and antibiotics.

**SCD inhibitor, ILK inhibitor, and Porcupine inhibitor treatment of HSCs/BSCs or TICs/Huh7.** Pharmacologic inhibitors of SCD (A939572 from BioVision) (1-2  $\mu$ M), ILK (Cpd22 from Calbiochem) (1-3  $\mu$ M), and Porcupine (LGK974 from StemRD) (0.5  $\mu$ M) or vehicle control were used to treat HSCs/BSCs in serum-free medium from 20-96 h unless otherwise indicated. Prior to treatment with inhibitor, HSCs/BSCs were washed with serum free medium twice. Cells were replenished with fresh inhibitor or vehicle every 48 h when applicable (for treatments >2 days). SCD inhibitor 100-1000 nM for TICs or 20-90  $\mu$ M for Huh7 was used for treatment from 24-48 h unless otherwise indicated.

**Preparation of BSA-conjugated fatty acids and treatment of HSCs/BSCs or TICs/Huh7.** Oleic acid (O1008), stearic acid (S4751), palmitic acid (P0500), and palmitoleic acid (P9417), and fatty acid free-BSA (A8806) were purchased from Sigma. BSA-conjugated fatty acids were prepared by diluting 50 mM stock fatty acids in DMSO with 100 mg/ml BSA in 1x PBS to produce a 3 mM working solution. Cells were then treated with a final concentration of 30  $\mu$ M BSA-conjugated fatty acid (and a final concentration of 0.1% BSA) or vehicle control. Cells were replenished with fresh BSA-conjugated fatty acid or vehicle every 48 h when applicable (for treatments >2 days).

**RNA extraction and RT-qPCR.** Total RNA was extracted from HSCs/BSCs or liver TICs/HCC cell lines or normal hepatocytes using the Quick-RNA MiniPrep (Zymo Research) or Direct-zol RNA MiniPrep Kit (Zymo Research). For RT-qPCR, cDNAs were synthesized from 1  $\mu$ g total RNA using the Maxima First Strand Synthesis Kit for RT-qPCR (Thermo Scientific). Quantitative PCR was performed where cDNA was amplified for 40 cycles using the SYBR Green PCR master mix (Applied Biosystems) and the ViiA 7 Real-Time PCR System (Applied Biosystems). Each threshold cycle (Ct) value was first normalized to the 36B4 (Rplp0) Ct value of a sample and subsequently to a control sample.

**Primer sequences.** Primer sequences used for RT-qPCR, ChIP assay.

| RT-qPCR primers | Species       | Forward Primer Sequence (5'->3') | Reverse Primer Sequence (5'->3') |
|-----------------|---------------|----------------------------------|----------------------------------|
| Acta2           | rat           | TGTGCTGGACTCTGGAGATG             | GATCACCTGCCCATCAGG               |
| Acta2           | mouse         | CTGAGCGTGGCTATTCCTTC             | CTTCTGCATCCTGTCTAGCAA            |
| Birc5           | rat           | GTACCTTAAGGACCACCGGATC           | GTCATCCGGTTCCCAGCCTTCC           |
| Ccnd1           | rat,<br>mouse | TGGAAGTCTTCTGGTGAAC              | TTCACATCTGTGGCACAGAG             |
| Col1a1          | rat           | TCGATTCACCTACAGCACGC             | GACTGTCTTGCCCCAAGTTCC            |
| Col1a1          | mouse         | CACCACCCTCAAGAGCCTGAGTC          | GTTCCGGCTGATGTACCAGT             |
| Lrp5            | rat           | GCCATCGACTATGACCCACT             | CTCGGTGTTACAAGGGTC               |
| Lrp6            | rat           | TGGATCTGGCAGTCAGTTTG             | CGATCAGTGCCAGTGTCTG              |
| Nanog           | mouse         | AGGGTCTGCTACTGAGATGCTCTG         | CAACCACTGGTTTTTCTGCCACCG         |
| Pparg           | rat           | CCTGAAGCTCCAAGAATACCAA           | AGAGTTGGGTTTTTTCAGAATAATAA<br>GG |
| Pparg           | mouse         | AAGAGCTGACCCAATGGT               | ATGGTCTTCGGAAAAA                 |

|                                            |                |                                            |                                            |
|--------------------------------------------|----------------|--------------------------------------------|--------------------------------------------|
| RPLP0                                      | human          | CAGATTGGCTACCCAAGTGT                       | GGAAGGTGTAATCCGTCTCCAC                     |
| Rplp0                                      | rat            | TCCCCACTGGCTGAAAAGGT                       | CGCAGCCGCAAATGC                            |
| Rplp0                                      | mouse          | AGATTCCGGGATATGCTGTTGGC                    | TCGGGTCCTAGACCAGTGTTTC                     |
| SCD                                        | human          | GCAGGACGATATCTCTAGCT                       | GTCTCCAACCTATCTCCTCCATTC                   |
| Scd1                                       | rat            | TACTACTCTGGTGCTCAACGC                      | AGGATGTTCTCCCGAGATTG                       |
| Scd1                                       | mouse          | GCGATACACTCTGGTGCTCA                       | CCCAGGGAAACCAGGATATT                       |
| Scd2                                       | rat            | TCCTGCTCATGTGCTTCATC                       | TCTCCCGAGAGCTGATGTTC                       |
| Scd2                                       | mouse          | GCTCTCGGGAGAACATCTTG                       | CAGCCCTGGACACTCTCTTC                       |
| Sox2                                       | mouse          | GGCAGCTACAGCATGATGCAGGAG<br>C              | CTGGTCATGGAGTTGTACTGCAGG                   |
| Colla1                                     | mouse          | CACCCTCAAGAGCCTGAGTC                       | GTTCCGGGCTGATGTACCAGT                      |
| Mmp9                                       | mouse          | CTGGACAGCCAGACACTAAAG                      | CTCGCGGCAAGTCTTCAGAG                       |
| Mmp13                                      | mouse          | CTTCTTCTTGTTGAGCTGGACTC                    | CTGTGGAGGTCAGTGTAGACT                      |
| Tgfb1                                      | mouse          | TTGCTTCAGTCCCACAGAGA                       | TGGTTGTAGAGGGCAAGGAC                       |
| Timp1                                      | mouse          | GTAAGGCCTGTAGCTGTGCC                       | AGGTGGTCTCGTTGATTCT                        |
| Cd3                                        | mouse          | ATGCGGTGGAACACACTTTCTGG                    | GCACGTCAACTCTAACTGGT                       |
| Cd20                                       | mouse          | AACCTGCTCCAAAAGTGAACC                      | CCCAGGGTAATATGGAAGAGGC                     |
| Cd68                                       | mouse          | TGTGTGATCTTGCTAGGACCG                      | GAGAGTAACGCCTTTTTGTGA                      |
| <b>ChIP primers</b>                        | <b>Species</b> | <b>Forward Primer Sequence (5'-&gt;3')</b> | <b>Reverse Primer Sequence (5'-&gt;3')</b> |
| Scd1<br>(Novel<br>SRE,NF-<br>Y1,NF-<br>Y2) | rat            | AGGAGAGAGCGAGGAGCTAGT                      | TGCCTGAGGGTAAATGCTAATGCG                   |
| Scd2<br>(Novel<br>SRE,NF-<br>Y1,NF-<br>Y2) | rat            | ACAGCAGATTGTGCAGAG                         | CGTAAACTCTGGCTAGTCATTGG                    |

**TaqMan quantitation of Scd1 and Scd2 gene expression.** qPCR was performed using pre-designed TaqMan primer/probe sets (Applied Biosystems) for *Scd1* (Rn00594894\_g1), *Scd2* (Rn00821391\_g1), and normalised to 36B4 (Rn03302271\_gh) expression, after total RNA was extracted and cDNA was synthesized as described above.

**TaqMan quantitation of miRNAs predicted to bind and regulate Lrp6 mRNA.** In-silico algorithms (<http://mirdb.org/miRDB/>)(Wong and Wang 2015) for screening possible miRNA binding to Lrp6 mRNA 3' UTR predict possible regulation by miR-195, miR-183, miR-15b, and miR-322. Thus, qPCR was performed using pre-designed TaqMan primer/probe sets (Thermo Fisher Scientific Inc.) for miR-15b (000390), miR-126 (002228), miR-183 (002269), miR-195 (000494), and miR-322 (001076) and normalized to U6 snRNA (001973) expression after miRNA was extracted using miRNeasy kit (Qiagen) and cDNA was synthesized as described above.

**Transient transfection and reporter gene assay.** The mouse *Scd1* promoter (-589/+81)-luciferase and its deletion or mutation constructs, and expression vectors for SREBP-1c and  $\beta$ -catenin were generous gifts of investigators as indicated in Acknowledgements. BSC in 12-well plates were transfected with the promoter-reporter construct with one or a combination of the expression vectors or empty vectors using the non-lipid cationic Targefect F2 transfection reagent (Targeting Systems, San Diego, CA) at a 1:1 ratio of total amount of DNA ( $\mu$ g) to volume of F2 ( $\mu$ l). Two hours after transfection, the cells were treated with FJ9 or vehicle. After 24 h, the cells were washed in PBS and solubilized for determination of firefly luciferase activity using the Dual-Luciferase® Reporter Assay System (Promega, Madison, WI). Firefly luciferase activity was normalized to lysate total protein concentration for calculation of relative changes in the promoter activity. Lrp6 5'UTR, CR-F1, 3'UTR-F2 luciferase reporter

constructs were obtained from Prof. Jian-Ying Wang of University of Maryland. BSC in 12-well plates were transfected with the luciferase-reporter construct with one of the expression vectors using the non-lipid cationic Targefect F2 transfection reagent (Targeting Systems, San Diego, CA) at a 1:1 ratio of total amount of DNA ( $\mu\text{g}$ ) to volume of F2 ( $\mu\text{l}$ ). Twenty-four hours after transfection, the cells were treated with SCD inhibitor or vehicle. At conclusion of treatment, cell lysates were prepared and relative changes in promoter activity were determined as described above. Huh7 in 12-well plates were transfected with the luciferase-reporter construct with one of the expression vectors using the BioT reagent (Bioland Scientific, LLC, Paramount, CA) at a using a BioT ( $\mu\text{l}$ ) to DNA ( $\mu\text{g}$ ) ratio of 1.5:1. Five hours after transfection, the cells were treated with SCD inhibitor or vehicle. At conclusion of treatment, cell lysates were prepared and relative changes in promoter activity were determined as described above.

**Chromatin immunoprecipitation (ChIP) assay.** Cross-linking ChIP was performed as previously described<sup>9</sup> except that Dynabeads protein A or G (Life Technologies) was used to immunoprecipitate fragmented chromatin. For quantitative ChIP assay, the thermal cycle was set at 94°C 10 min, followed by 40 cycles of 30 sec at 94 °C and 1 min at 60 °C. A dissociation curve was generated to make sure of the product specificity. The final result was represented as  $2^{(Ct_{\text{Input}} - Ct_{\text{Output}})}$ . Anti  $\beta$ -catenin antibody was purchased from Cell Signaling Technology (9562), while anti SREBP-1 antibody was from Santa Cruz Biotechnology (sc-13551). For ChIP-re-ChIP, the elution was performed with 20mM DTT for 30 min at room temperature. Then the eluate was desalted with the Pierce Zeba spin desalting column, and ChIP assay with the second antibody was performed as referenced above. The qPCR primer sequences to amplify rat *Scd1* and *Scd2* novel SRE/NFY1 and/or novel SRE/NFY1 and 2 sites are listed in “Primer sequences” section.

**Fatty acid composition analysis.** Total fatty acids were extracted from day 1 or day 7 cultured HSCs ( $0.4 \times 10^6$  cells) by the method previously described<sup>10</sup>. Fatty acids extracted with petroleum ether were derivatized to methyl esters for gas chromatography/mass spectrometry (GC/MS) analysis using a Hewlett-Packard selective mass detector (model 5973) connected to a gas chromatograph (model 6890) as described before<sup>11</sup> at the Metabolomic Core of the Southern California Research Center for ALPD and Cirrhosis. A glass capillary column BPX70 (SGE, Austin, TX) was used to separate fatty-acid derivatives using carrier gas (helium) flow rate 1 ml/min, injector temperature 250°C, and oven temperature programmed from 120 to 220°C at 5°C/min. Under these conditions, the retention time (min) and mass spectra (m/z) for fatty acids were as follows: C14:0 (3.87 min/242 m/z), C16:0 (5.76 min/270 m/z), C16:1 (n-7) (5.82 min/268 m/z), C17:0 (internal standard, 6.2 min/284 m/z), C18:0 (8.36 min/298 m/z), C18:1(n-9) (8.73 min/296 m/z), C18:1 (n-7) (8.9 min/296 m/z), C18:2 (n-6) (9.91 min/294 m/z), C20:0 (11.48 min/326 m/z), C20:4 (n-6) (14.44 min/318 m/z), C22:0 (14.86 min/354 m/z), C22:1 (15.32 min/352 m/z), and C24:0 (17.13 min/382 m/z). The quantity of individual fatty acids was calculated against the known amount of C17:0 internal standard. Fatty acid desaturation index that correlates with SCD activity was determined by the ratios of 16:1(n-7)/16:0 (palmitoleic acid/palmitic acid) and 18:1(n-9)/18:0 (oleic acid/stearic acid)<sup>12</sup>.

**Immunoblot analysis.** Cell lysates were prepared by washing cells with ice-cold PBS twice, and then lysing on ice for 5 min with RIPA buffer containing freshly added protease inhibitor, PMSF, and Na3VO4 (Santa Cruz Biotechnology). After scraping cells from the plate, the lysates were transferred to a new microfuge tube and incubated on ice for 20 min, vortexed briefly, and then centrifuged at 14,000 rpm for 10 minutes at 4°C. Supernatants were assayed for protein concentration using Coomassie (Bradford) Protein Assay Kit (Thermo Scientific), and then mixed with 6x SDS sample buffer before resolving by 6%-10% SDS-PAGE, transferring onto PVDF membrane, and immunoblotting. For immunoblotting, membrane was incubated with primary antibody in 5% non-fat-milk/1x TBS containing 0.1% Tween20 overnight at 4°C, followed by incubation with a horseradish peroxidase-conjugated secondary antibody (Santa Cruz Biotechnology). Proteins were detected by a chemiluminescent method using Lumi-Light Western Blotting Substrate kit (Roche), and/or SuperSignal West Femto kit (Pierce).

| Primary antibodies for Immunoblot | Maker (Catalog No.)                          |
|-----------------------------------|----------------------------------------------|
| Acta2                             | Sigma-Aldrich (A2547, clone 1A4)             |
| beta-actin                        | Santa Cruz Biotechnology (sc-47778; sc-1616) |
| p-AKT (S473)                      | Cell Signaling Technology (#4051)            |
| AKT                               | Cell Signaling Technology (#9272S)           |
| Non-p-beta-catenin (S33/37/T41)   | Cell Signaling Technology (#4270)            |
| p-beta-catenin (S552)             | Cell Signaling Technology (#9566)            |

|                    |                                                      |
|--------------------|------------------------------------------------------|
| Total beta-catenin | Cell Signaling Technology (#9562)                    |
| Dvl2               | Cell Signaling Technology (#3224)                    |
| Fzd1               | Santa Cruz Biotechnology (sc-398082)                 |
| GAPDH              | GeneTex (GT239); Santa Cruz Biotechnology (sc-32233) |
| GFP                | Santa Cruz Biotechnology (sc-8334)                   |
| p-GSK3beta (S9)    | Cell Signaling Technology (#9322S)                   |
| GSK3beta           | Cell Signaling Technology (#9315S)                   |
| His                | Santa Cruz Biotechnology (sc-8036)                   |
| HuR                | Santa Cruz Biotechnology (sc-5261)                   |
| ILK                | Millipore (MABT66)                                   |
| Lamin B1           | Santa Cruz Biotechnology (sc-20682)                  |
| LRP5               | Cell Signaling Technology (#5731)                    |
| p-LRP6 (S1490)     | Cell Signaling Technology (#2568P)                   |
| LRP6               | Millipore (MABS341)                                  |
| MeCP2              | Abcam (ab2828)                                       |
| Ran1               | Santa Cruz Biotechnology (sc-1156)                   |
| SCD1               | Abcam (ab19862)                                      |
| Transportin 1      | Sigma-Aldrich (T0825, clone D45)                     |

**ILK activity assay.** ILK kinase assay was done using Akt Kinase Assay Kit (Nonradioactive) (Cell Signaling Technology, #9840) with minor modifications as described previously<sup>13</sup>. Immunoprecipitation with anti-ILK: Cell lysates were prepared and protein concentration measured as described above. Next, 200 µg-400 µg/400 µl of cell lysates were pre-cleared for 1 h at 4°C with 30 µl of protein A/G plus agarose (Santa Cruz Biotechnology, sc-2003) and normal rabbit IgG (Santa Cruz Biotechnology, sc-2027). Pre-cleared lysates were then incubated with anti-ILK antibody (Millipore, MABT66) or normal rabbit IgG (control) overnight at 4°C. 50 µl of protein A/G plus agarose was then added to lysates, followed by incubation for 2 h at 4°C. After washing with ice-cold RIPA buffer 3 times, each sample was mixed with 2x SDS sample buffer, prior to immunoblot analysis as described above. Activity (kinase) assay: Briefly, after washing with RIPA buffer in the immunoprecipitation procedure described above, pulled-down samples were washed with 1x kinase buffer twice, and then incubated with 1x kinase buffer containing 200 µM of ATP and 1 µg of GST-fusion GSK3α/β substrates for 30 min at 30°C. The kinase reaction was terminated by addition of 3x SDS sample buffer, prior to immunoblot analysis as described above. Phosphorylation of GSK3α/β substrates (a read-out for ILK activity) was detected by anti-phospho-GSK-3α/β (S21/9) provided in the manufacturer's kit.

**LRP5/6 protein and mRNA stability assays.** To assess the effect of SCD inhibition on LRP5/6 protein stability, BSCs were treated with SCD inhibitor or vehicle in the presence of cycloheximide (10 ng/ml) or its absence. Protein lysates were collected at various time points from 0 to 20-24 h after treatment, and analyzed by immunoblot analysis as described above. Densitometric analysis for LRP5/6 protein expression was done by normalizing LRP5/6 expression to respective GAPDH expression. To assess the effect of SCD inhibition on LRP5/6 mRNA transcription/stability: 1) BSCs were treated with SCD inhibitor or vehicle for 6 h, 12 h, 18 h, and 24 h in serum-free medium; 2) BSCs were treated without or with actinomycin D (1 nM) for 6 h in serum-free medium and treated with SCD inhibitor or vehicle for an additional 6 h, 12 h, 18 h, and 24 h. RNA extraction and RT-qPCR for LRP5/6 were done as described above.

**Cytoplasmic and nuclear extracts.** Cytoplasmic and nuclear proteins from BSC and Huh7 cells were extracted using NE-PER™ Nuclear and Cytoplasmic Extraction Kit (Thermo Scientific) as previously described<sup>14</sup>.

**Ribonucleoprotein Immunoprecipitation (RIP).** RiboCluster Profiler RIP-Assay Kit (#RN1001) and Anti-ELAVL1/HuR polyclonal antibody (#RN0004P) were purchased from MBL. After Huh7 cells in 10 cm plates were treated with SCDi (20µM) concurrently with OA/SA (30µM) for 24 hours, collected and washed with cold PBS for three times, RIP assay was performed according to the manufacture's protocol. Briefly, cells were lysed



with RNase inhibitor containing lysis buffer and immunoprecipitated with IgG or HuR antibody immobilized Protein A/G plus Agarose beads for 3 hours at 4°C. After washing four times, RNA was extracted from both Bead-Antibody RNP complex and lysates which did not undergo immunoprecipitation (the latter used for input control), and then purified with RNA Clean and Concentrator-5 Kit with DNase I treatment from Zymo Research (#R1013). The isolated RNA was reverse-transcribed to cDNA and subjected to qPCR analysis for HuR-Lrp6 mRNA RIP analysis with primer sequences designed within HuR 3'UTR: 5'-CCGGTAGCTATATGGCCTGT-3' and 5'-GCCACAGAGCGATCACATTA-3'.

**Affinity purification of OA-binding proteins.**

Control, stearic acid, elaidic acid and oleic acid-fixed affinity nano-beads were prepared as previously described<sup>15</sup>. Briefly, stearic acid, elaidic acid or oleic acid was incubated at 1 mM with equal amounts of *N*-hydroxysuccinimide and 1-ethyl-3-(3-dimethylaminopropyl) carbodiimide (Dojindo) for 2 h at room temperature and then reacted overnight with amino-modified affinity beads. For purification of OA-binding proteins, 0.2 mg of beads were equilibrated with the binding buffer (20 mM HEPES (pH7.9), 100 mM NaCl, 1 mM MgCl<sub>2</sub>, 0.2 mM EDTA, 10% glycerol, 1 mM DTT, 0.2 mM PMSF, 0.1% NP40), and incubated with 0.2 mg/ml of TIC cell lysate at 4°C for 1 h. Bound proteins were eluted with SDS-loading dye, analysed by SDS-PAGE and then visualized by silver staining (Wako). Bound proteins were subjected to in-gel digestion by trypsin, and the fragments of the peptides were analysed by ESI-MS (Waters: Synapt G2).

**Computational analysis of Oleic Acid binding at the interface of Transportin-1 and Ran1.** Three-dimensional structure of Transportin-1(TNPO1) at 3Å (PDB code: 2QMR) was used as a template to search for putative binding site of OA. In preparation for ligand binding studies, a robust structure model was built using homology modeling feature in Schrodinger (Schrodinger, Inc. San Diego CA). Briefly, several structural templates (PDB codes: 2QMR, 2QNA, 2w3z, 2buku etc.) were used to build the overall structure followed by loop search using prime module. Final structure model was minimized and subjected to a short molecular simulation to obtain a stereochemically acceptable structural model. Binding studies were performed using Glide (Schrodinger) and Autodock. Figures were produced using Pymol (Schrodinger, LLC. The PyMOL Molecular Graphics System, Version 1.3r1. 2010.).

**Immunoprecipitation of Huh7 protein lysates to assess Transportin-1/Ran1 interaction.** For IP assay, the Huh7 cells in 10cm dishes were treated with SCDi(20µM) concurrent with OA/SA (30µM) under serum -free condition for 24 hours, then the cell proteins were extracted in RIPA Lysis Buffer (Santa Cruz Biotechnology) containing 1mM PMSF and Halt protease & phosphatase inhibitor cocktail (Thermo Scientific) on ice. Then, 200µl proteins (>3mg/ml) were immunoprecipitated with a mouse monoclonal anti-Transportin 1 (T0825, clone D45) from Sigma-Aldrich with 1:50 dilution overnight in cold room, and pulled down by protein A/G plus Agarose beads (Santa Cruz Biotechnology) for 4 hours. After four times wash, the protein samples were released by SDS sample buffer with boiling. IB was performed using mouse monoclonal anti-transportin 1 antibody (T0825, clone D45, 1:1000 dilution) from Sigma-Aldrich or rabbit polyclonal antibodies against Ran1 (sc-1156, 1:1000 dilution).

**Protein expression and purification for cell free system to assess Transportin-1/Ran1 binding.** Transportin-1(TNPO1) protein vector (human) pPB-His-GST-TNPO1 was purchased from ABM (#PV445791). To make the construct expressing His6-GFP recombinant protein serving as control for His-tag pulldown assay, the PET28a-GFP was generated as following described. The GFP fragment was amplified from pEGFP-N1 (BD Biosciences) with two primers: GFP5E(5-TT GAA TTC ATG GTG AGC AAG GGC GAG GAG CTG-3) and GFP3S(5-TT GTC GAC CTT GTA CAG CTC GTC CAT GCC GAG-3), and then cloned into the pET28a plasmid at ECoRI and SalI sites. For His6-tagged recombinant protein expression, the vectors were transformed into E. coli BL21(DE3) cells. Expression and purification of recombinant proteins in E. coli BL21 (DE3) cells were carried out according to the manufacturer's instructions. Briefly, the purifications of His6-GFP and His-TNPO1 were performed under the native condition using Ni-NTA (Ni<sup>2+</sup>- nitrilotriacetate)-agarose columns. The protein was eluted with wash buffer plus 250mM imidazole and dialyzed against decreasing concentrations of imidazole in the same buffer as used for wash(Tris 20mM, pH=8.0, NaCl 0.5M, 1mM PMSF, and Halt protease inhibitor cocktail (Thermo Scientific). The pull-down assay was carried out in cold room as follows. Briefly, 100µl purified His-GFP and His-GST-TNPO1 protein (0.1mg/ml) were incubated with 50µl Ni-NTA resin for 2 hours. After three times wash with the same buffer, the resins were incubated with oleic acid/stearic acid (1mM) in fatty-acid free BSA solution (50mg/ml) for 6 hours. After another three times wash, the resins were incubated with 200µl Huh7 cell lysates in RIPA buffer (5.0mg/ml) on a rocking platform overnight, and then washed with wash buffer for four times. The pull-down complex was released from Ni-NTA resin together with His-tagged proteins by incubation with 100µl elution buffer (wash buffer containing 500mM imidazole) for 1hour. The samples were subjected to immunoblotting with mouse monoclonal antibody against His (sc8036, 1:1000 dilution), rabbit polyclonal antibodies against Ran1 (sc-1156, 1:1000 dilution) and GFP (sc-8334, 1:1000 dilution) from Santa Cruz

Biotechnology and mouse monoclonal anti-transferrin receptor 1 antibody (T0825, clone D45, 1:1000 dilution) from Sigma-Aldrich. For OA's dose-dependent inhibition of TNPO1/Ran1 binding, 0.1 – 5 mM OA versus 0 mM (vehicle DMSO) was used as indicated.

**TICs co-xenografted with Scd2 knockdown (Scd2 KD) HSCs vs. wild-type (WT) HSCs into nude mice.** HSCs were isolated from Scd2f/f mice and cultured. On day 3, these HSCs were trypsinized and then treated for 4-6 days with Ad.Cre vs. Ad.LacZ to generate Scd2 KD HSCs vs. WT HSCs, respectively, after which they were re-trypsinized and harvested. Then, ~5x10<sup>4</sup> TICs with Scd2 KD HSCs (1:1) vs. with WT HSCs (1:1) vs. without HSCs (1:0) were co-transplanted into nude mice. Tumor volumes were assessed up to 17 days after transplantation before mice were euthanized.

**DEN-induced, Western alcohol diet-promoted liver tumor development in Scd2f/f and Scd2f/f;CC mice.** Scd2f/f vs. Scd2f/f;CC mice at 2 weeks of age were treated i.p. with DEN (Sigma, 25 mg/kg) and then fed the Western alcohol diet (Dyets, Inc. #710362) high in cholesterol and Saturated fat for 4 months, after which mice were euthanized for assessment of tumor incidence, multiplicity and volume.

**Acknowledgements.** We thank Peter Edwards (UCLA) for Scd1 promoter-reporter constructs, Michael Kahn (USC) for ICG-001, Timothy Osborne (UC Irvine) for SREBP-1c expression vector, Randall Moon (University of Washington) for  $\beta$ -catenin expression vector, Calvin Kuo (Stanford University) for adenovirus expressing DKK-1, Jiaohong Wang, Stephanie Pan, Yuntao Wang, and Raul Lazaro for technical support from the Southern California Research Center for ALPD and Cirrhosis, Deborah L. Berry for technical support at the Histopathology and Tissue Shared Resource of Lombardi Comprehensive Cancer Center of Georgetown University, and Kenneth Dorko for technical support at the Department of Pharmacology, Toxicology and Therapeutics Cell Isolation Core of the University of Kansas Medical Center.

## Supplemental References

1. Cheng JH, She H, Han YP, et al. Wnt antagonism inhibits hepatic stellate cell activation and liver fibrosis. *Am J Physiol Gastrointest Liver Physiol* 2008;294:G39-49.
2. Fujii N, You L, Xu Z, et al. An antagonist of dishevelled protein-protein interaction suppresses beta-catenin-dependent tumor cell growth. *Cancer Res* 2007;67:573-9.
3. Emami KH, Nguyen C, Ma H, et al. A small molecule inhibitor of beta-catenin/CREB-binding protein transcription [corrected]. *Proc Natl Acad Sci U S A* 2004;101:12682-7.
4. Chen CL, Tsukamoto H, Liu JC, et al. Reciprocal regulation by TLR4 and TGF- $\beta$  in tumor-initiating stem-like cells. *J Clin Invest* 2013;123:2832-49.
5. Bansal S, Berk M, Alkhouri N, et al. Stearoyl-CoA desaturase plays an important role in proliferation and chemoresistance in human hepatocellular carcinoma. *J Surg Res* 2014;186:29-38.
6. Strom SC, Pisarov LA, Dorko K, et al. Use of human hepatocytes to study P450 gene induction. *Methods Enzymol* 1996;272:388-401.
7. Kim JH, Sohn BH, Lee HS, et al. Genomic predictors for recurrence patterns of hepatocellular carcinoma: model derivation and validation. *PLoS Med* 2014;11:e1001770.
8. Sung CK, She H, Xiong S, et al. Tumor necrosis factor-alpha inhibits peroxisome proliferator-activated receptor gamma activity at a posttranslational level in hepatic stellate cells. *Am J Physiol Gastrointest Liver Physiol* 2004;286:G722-9.
9. Yang MD, Chiang YM, Higashiyama R, et al. Rosmarinic acid and baicalin epigenetically derepress peroxisomal proliferator-activated receptor  $\gamma$  in hepatic stellate cells for their antifibrotic effect. *Hepatology* 2012;55:1271-81.
10. Lowenstein JM, Brunengraber H, Wadke M. Measurement of rates of lipogenesis with deuterated and tritiated water. *Methods Enzymol* 1975;35:279-87.
11. Xu J, Lee WN, Phan J, et al. Lipin deficiency impairs diurnal metabolic fuel switching. *Diabetes* 2006;55:3429-38.
12. Attie AD, Krauss RM, Gray-Keller MP, et al. Relationship between stearoyl-CoA desaturase activity and plasma triglycerides in human and mouse hypertriglyceridemia. *J Lipid Res* 2002;43:1899-907.
13. Tabe Y, Jin L, Tsutsumi-Ishii Y, et al. Activation of integrin-linked kinase is a critical prosurvival pathway induced in leukemic cells by bone marrow-derived stromal cells. *Cancer Res* 2007;67:684-94.
14. Xu J, Chi F, Guo T, et al. NOTCH reprograms mitochondrial metabolism for proinflammatory macrophage activation. *J Clin Invest* 2015;125:1579-90.
15. Kabe Y, Ohmori M, Shinouchi K, et al. Porphyrin accumulation in mitochondria is mediated by 2-oxoglutarate carrier. *J Biol Chem* 2006;281:31729-35.
